# Supplementary material for: The negative elongation factor NELF promotes induced transcriptional response of Drosophila ecdysone-dependent genes
Source: PubMed Central journal article supplement (PMC7794308; doi:10.1038/s41598-020-80650-1), 2021-01-08
Supplement: 41598_2020_80650_MOESM1_ESM.pdf [file 41598_2020_80650_MOESM1_ESM.pdf]

**The negative elongation factor NELF promotes induced transcriptional response of  
*Drosophila* ecdysone-dependent genes**

Marina Yu. Mazina<sup>1</sup>, Elena V. Kovalenko<sup>1</sup>, Nadezhda E. Vorobyeva<sup>1\*</sup>

<sup>1</sup>Institute of Gene Biology, Russian Academy of Sciences, Moscow 119334, Russia

\* Corresponding author (email to [vorobyeva@genebiology.ru](mailto:vorobyeva@genebiology.ru))

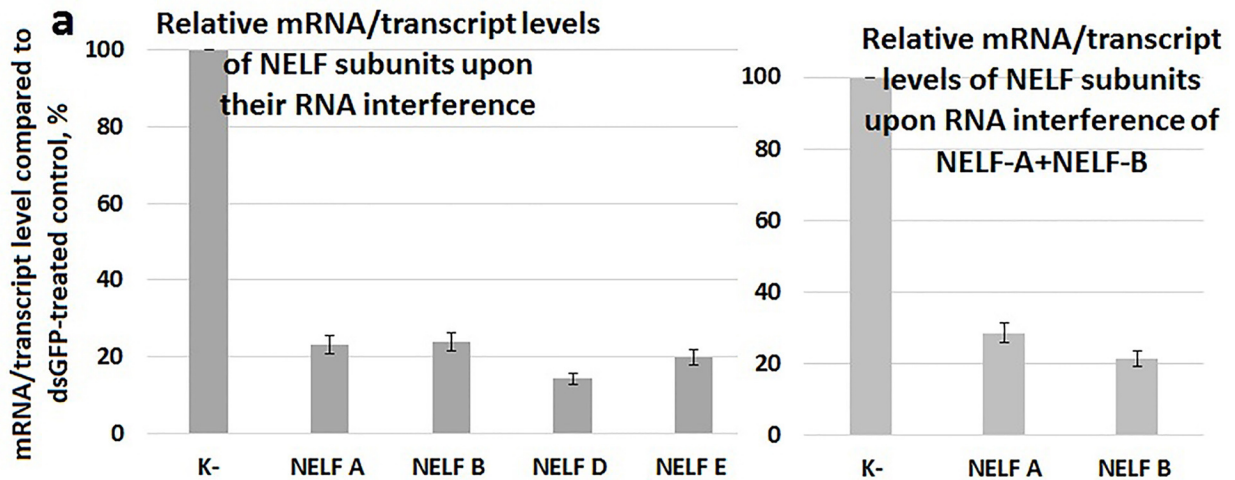

**b**

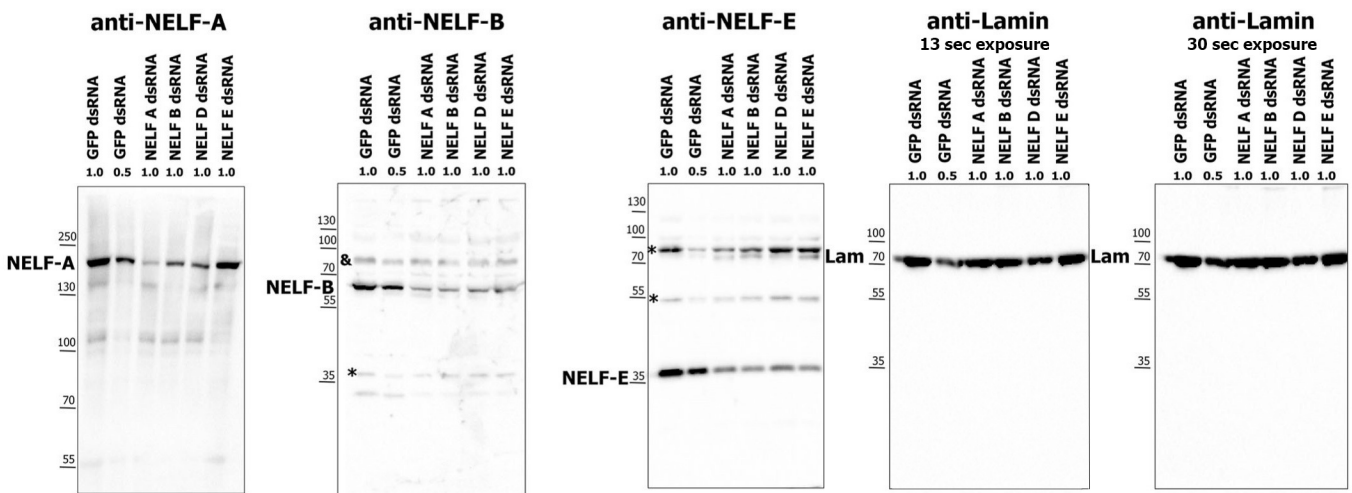

\* Lines corresponding to unspecific antibody-derived background; & Line left from a previous staining of this blot with anti-Lamin

**\*\*The high specificity of antibodies against the Lamin did not allow us to register the background signal**

**Supplementary figure 1.** (a) The reduction in mRNA level of NELF complex subunits upon their RNA interference-mediated knockdowns. S2 *Drosophila* cells, treated with dsRNA corresponding to GFP transcript, were used as a control (K-). Transcriptional levels were assessed by qRT-PCR. The Y-axis units represent expression level of the subunit in the corresponding knockdown compared to subunit expression in K- in percents. Data are mean values from three independent experiments, error bars represent standard deviations. (b) The test of RNA interference-mediated knockdowns efficiency of NELF subunits. Protein extracts from S2 *Drosophila* cells, treated with dsRNA against NELF-A, NELF-B and NELF-E, and dsRNA to GFP transcript were loaded. The antibodies, used for blot staining, are marked on the left of the figure. Numbers above the figure represent the relative portion of a loaded fraction. Anti-tubulin staining was used as loading control.

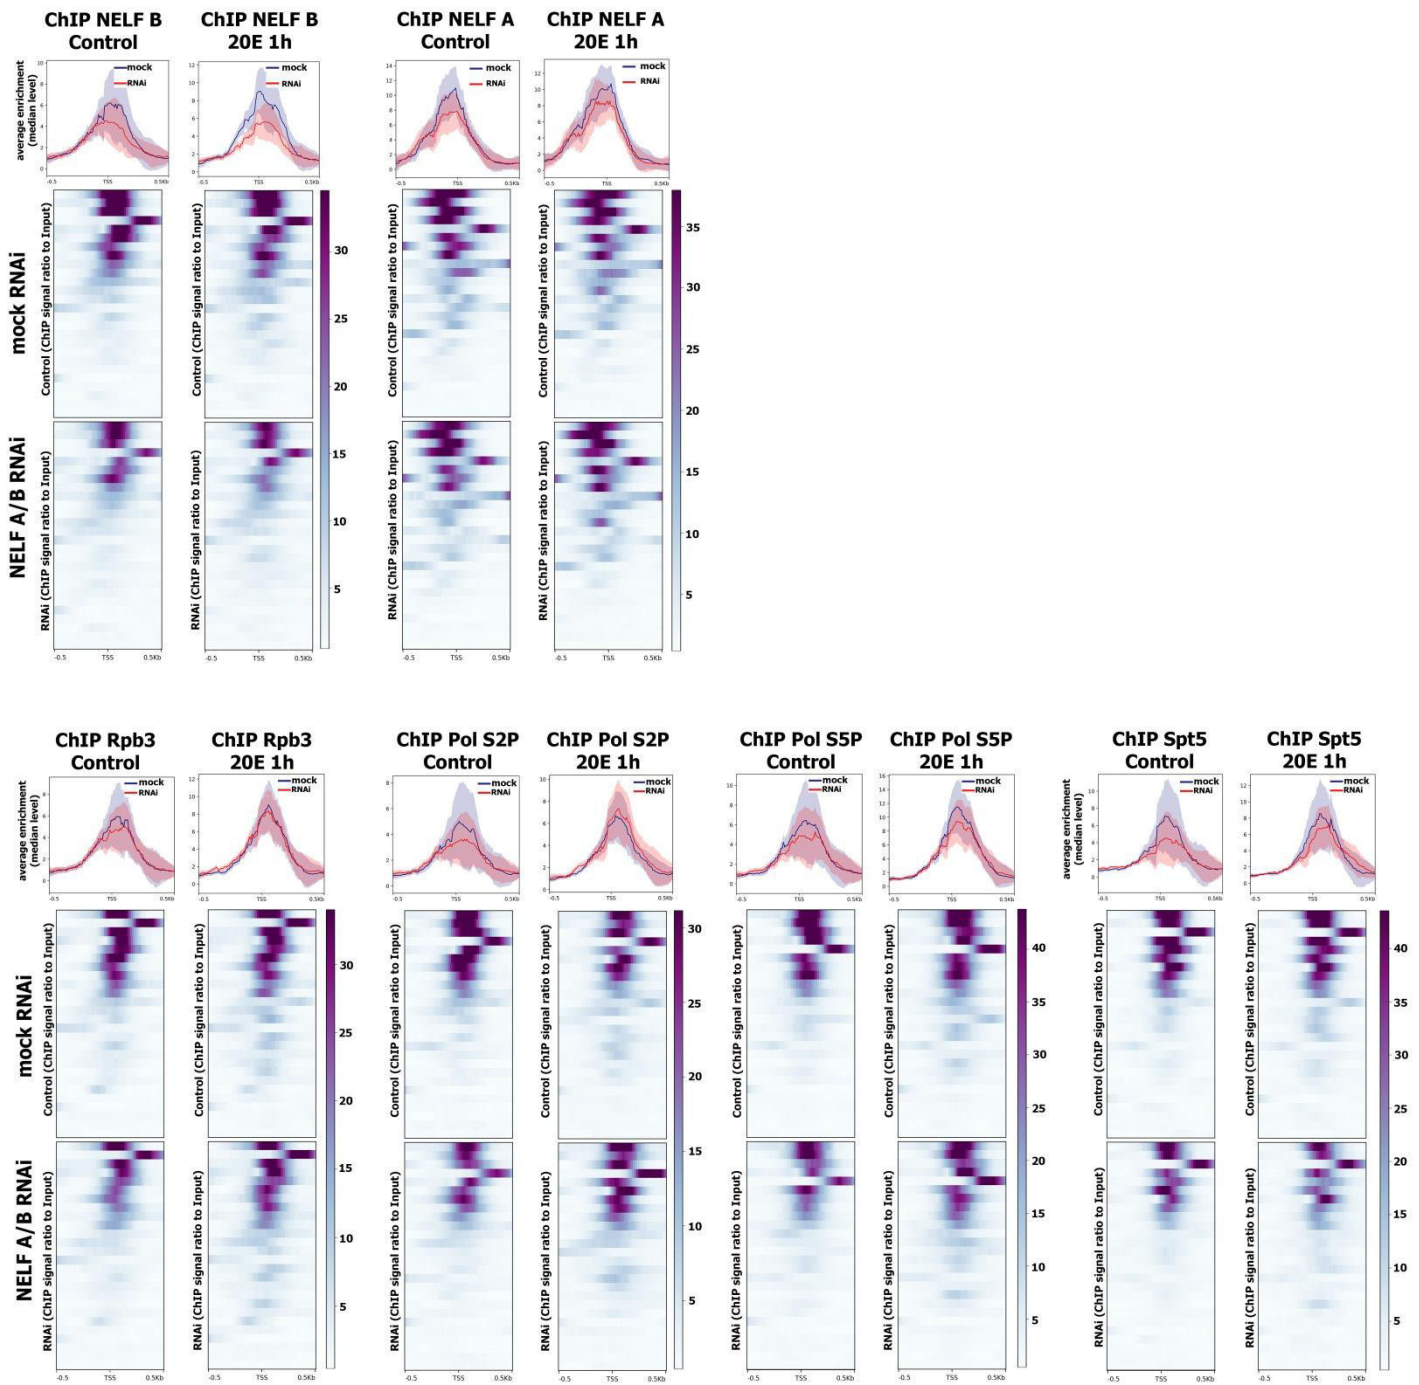

**Supplementary figure 2.** Average distribution of binding of NELF-B, NELF-A, Rbp3, Pol II, phosphorylated on Ser2 of CTD (Pol S2P), Pol II, phosphorylated on Ser5 of CTD (Pol S5P) and Spt5 on the transcription start sites (TSS) of 20E-dependent genes in *Drosophila* S2 cells upon 1h 20E induction (20E 1h) or in DMSO-treated cells (control). The cells were concomitantly treated with dsRNAs against NELF-B and NELF-A (NELFA/B RNAi) or dsRNA corresponding to GFP transcript (mock RNAi). Pile-up profiles were generated for the TSSs of 27 20E-dependent genes whose promoter regions demonstrated less than 2-fold decrease in NELF-B binding level upon treatment with dsRNA against NELF-A/NELF-B. Protein binding levels were estimated by ChIP-Seq as an enrichment (averaged profiles were generated as a median level). The standard error is displayed on the graphs as lighter area around the main line of the profiles.

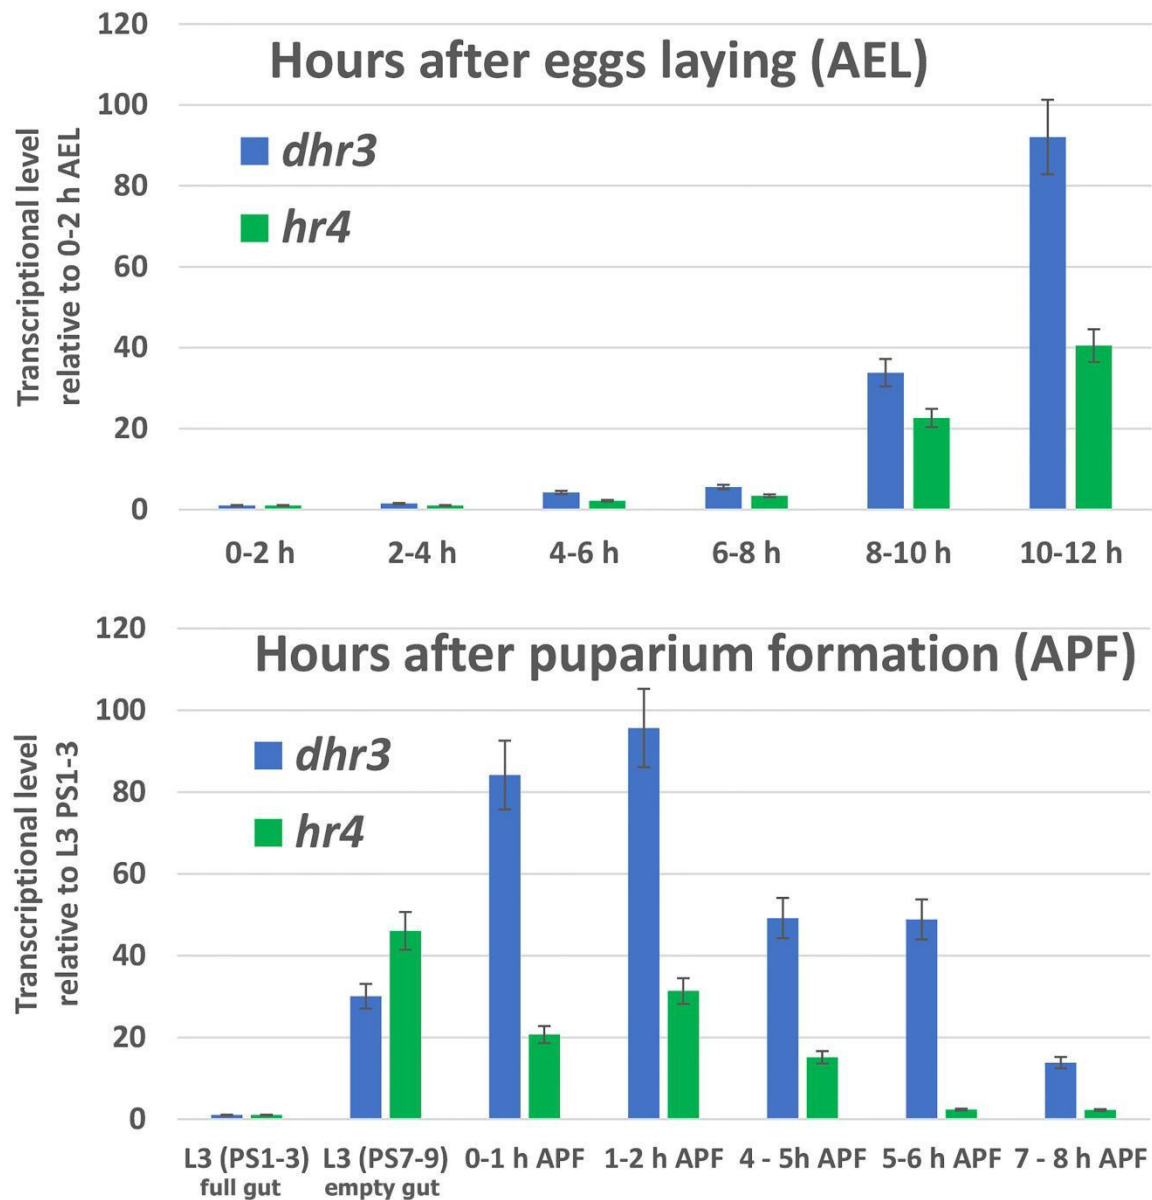

**Supplementary figure 3.** The transcription levels of *dhr3* (blue columns) and *hr4* (green columns) 20E-dependent genes during ontogenesis of *Drosophila* relative to their transcription during 0-2 hours after egg laying (AEL), for embryonic development, or relative to their transcription during L3 stage PS1-3 (full gut), for the stages after pupariation.

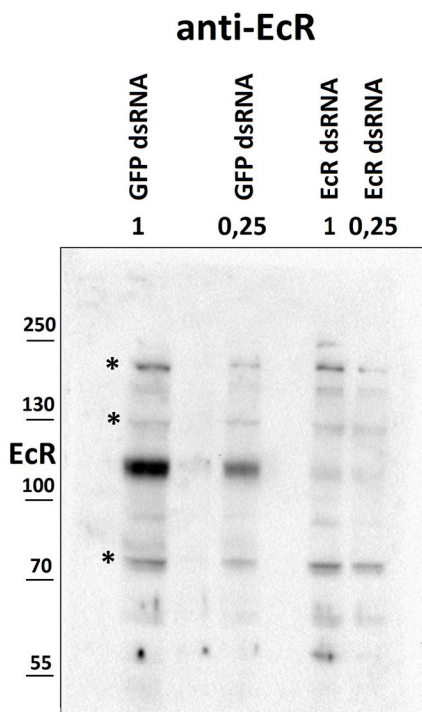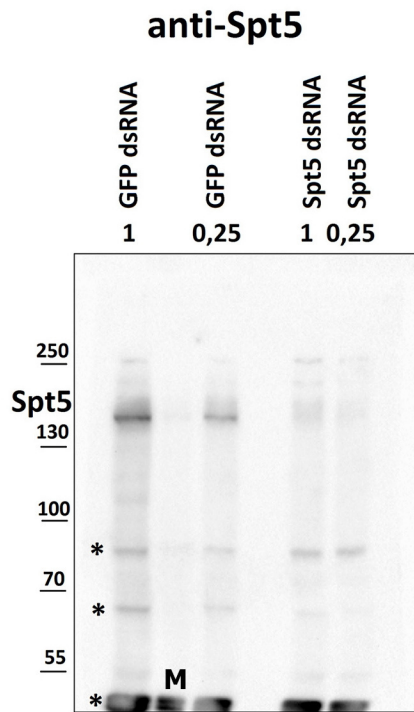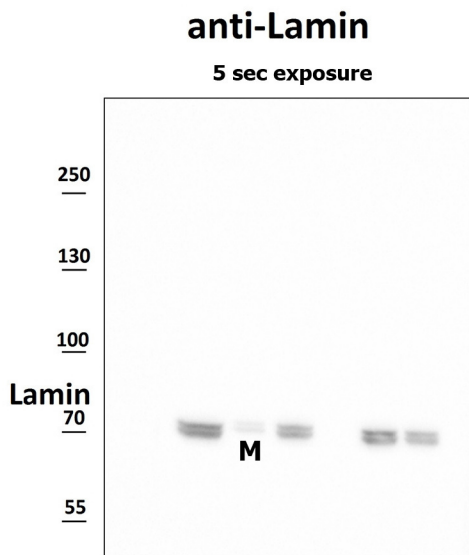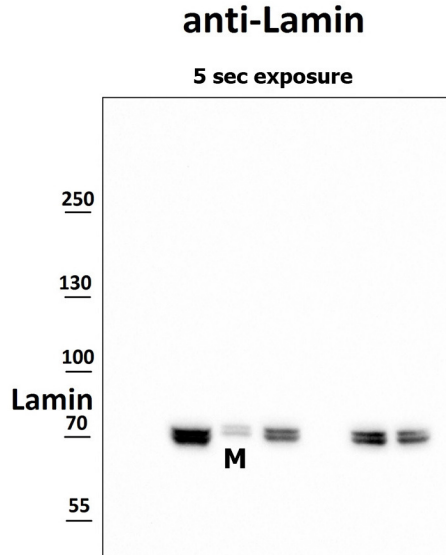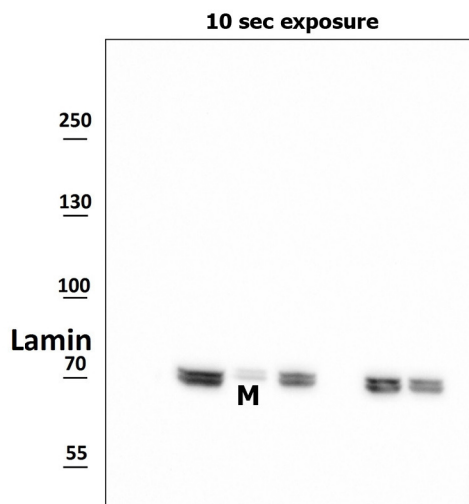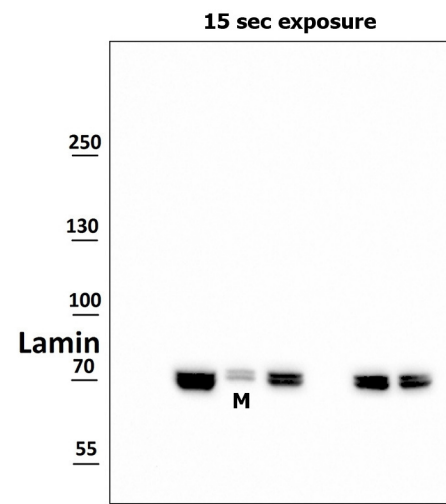

\*Lines corresponding to unspecific antibody-derived background;  
 M-control protein extract introduced into the well by mistake

\*\*The high specificity of antibodies against the Lamin did not allow us to register the background signal

**Supplementary figure 4.** The test of antibodies against EcR and Spt5. The depletion of corresponding proteins with RNA-interference was used to estimate the specificity of antibodies. Nuclear extracts from S2 *Drosophila* cells, treated with corresponding dsRNA, and dsRNA to GFP transcript were loaded. The antibodies, used for blot staining, are marked on the left of the figure. Numbers above the figure represent the relative portion of a loaded fraction. Anti-lamin staining was used as loading control.



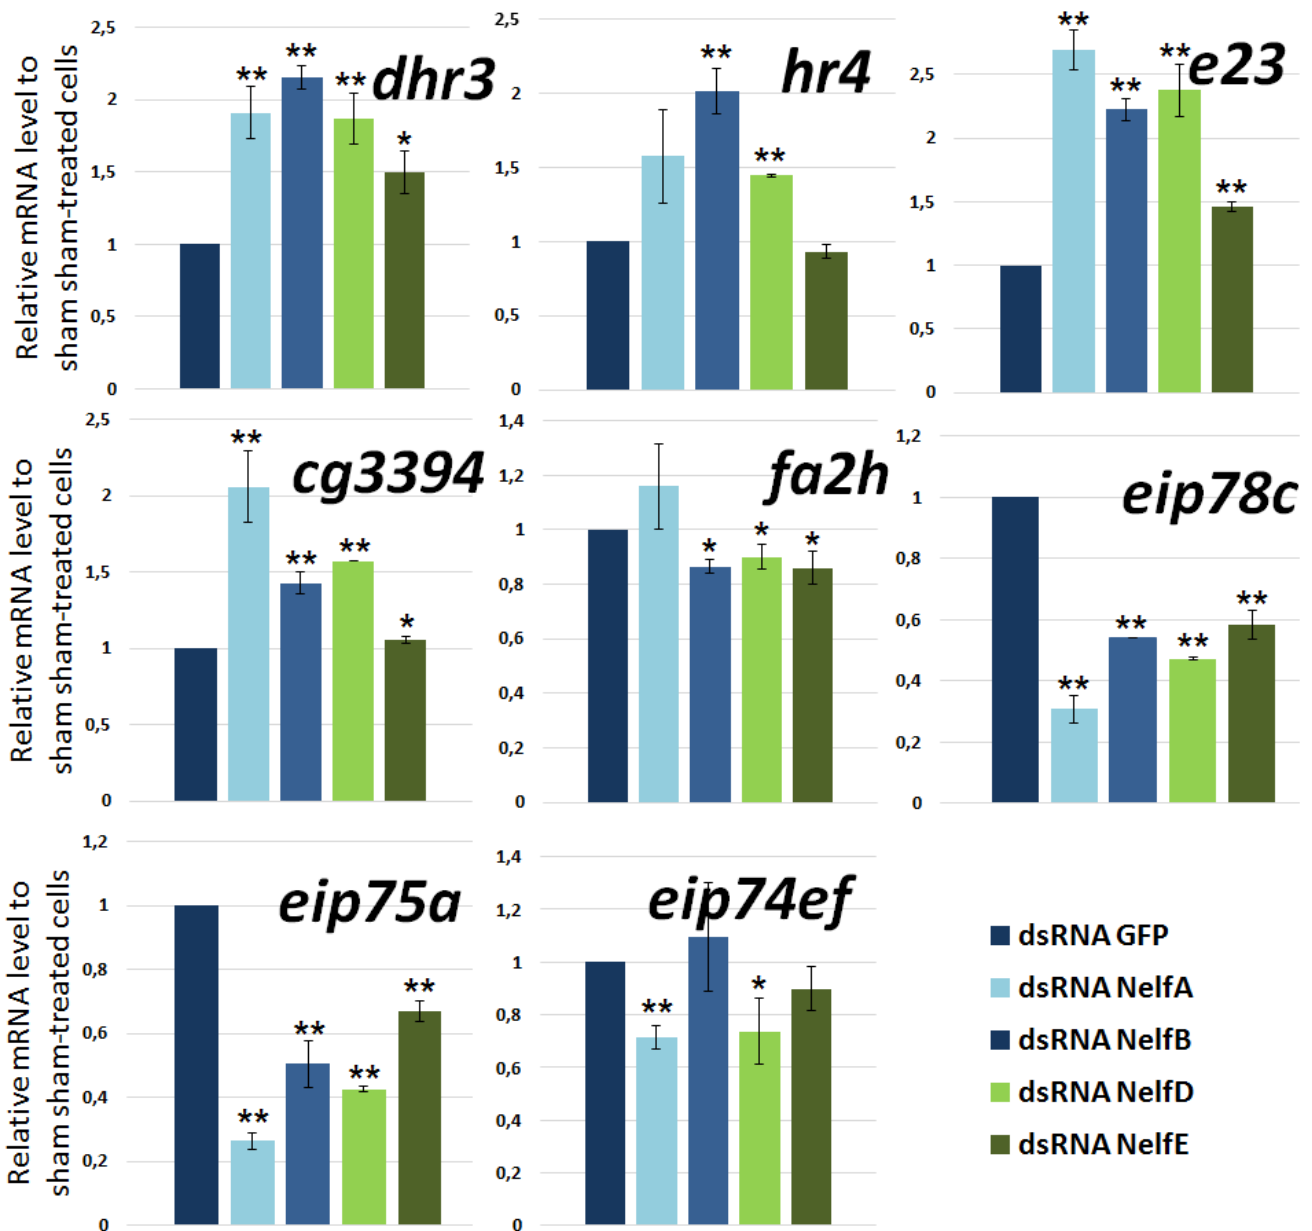

**Supplementary figure 5.** Relative mRNA levels of uninduced 20E-dependent genes in *Drosophila* S2 cells, treated with dsRNA corresponding to NELF-A, NELF-B, NELF-D and NELF-E subunits of NELF complex (dsRNA corresponding to GFP transcript in mock RNAi). Transcriptional levels were assessed by qRT-PCR. The Y-axis units represent transcriptional level of corresponding gene relative to mock RNAi treated cells, normalized on tubulin mRNA. Data are mean values from three independent experiments, error bars represent standard deviations. Asterisks indicate significance levels (Student's t-test), \*\* - p-value < 0.01, \* - p-value < 0.05. Statistical analysis was performed relative to the transcription levels of the genes in GFP dsRNA treated S2 cells.

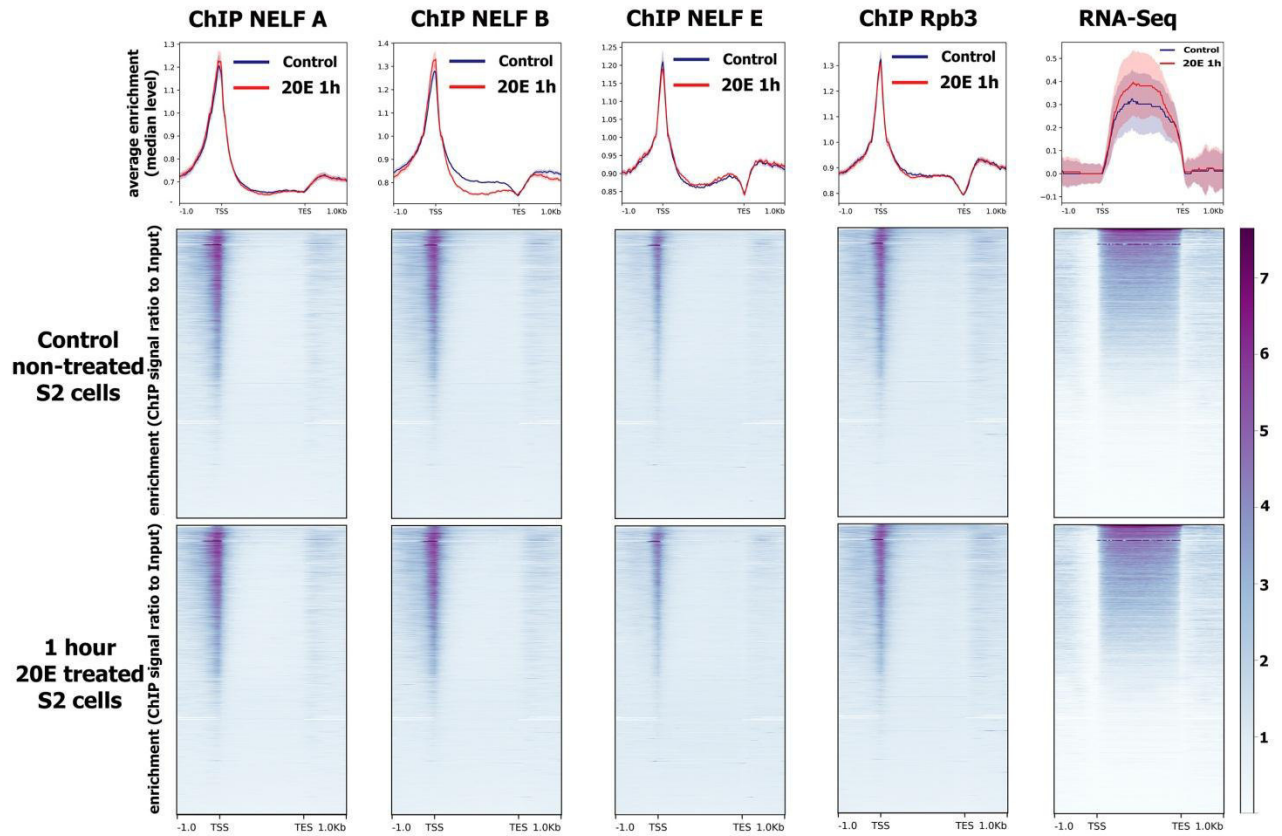

**Supplementary figure 6.** Average distributions of NELF-A, NELF-B, NELF-E and Rpb3 on all genes in *Drosophila* S2 cells after 1-hour treatment with 20E (20E 1h) or in non-treated cells (control). NELF-A, NELF-B, NELF-E and Rpb3 binding levels were estimated as an enrichment of NELF-A, NELF-B, NELF-E and Rpb3 ChIP-Seq signal over input DNA. Pile-up profiles were calculated as a median of NELF-A, NELF-B, NELF-E and Rpb3 binding levels. Average profiles were generated using metagene mode (introns were ignored). The standard error is displayed on the graphs as lighter area around the main line of the profiles.

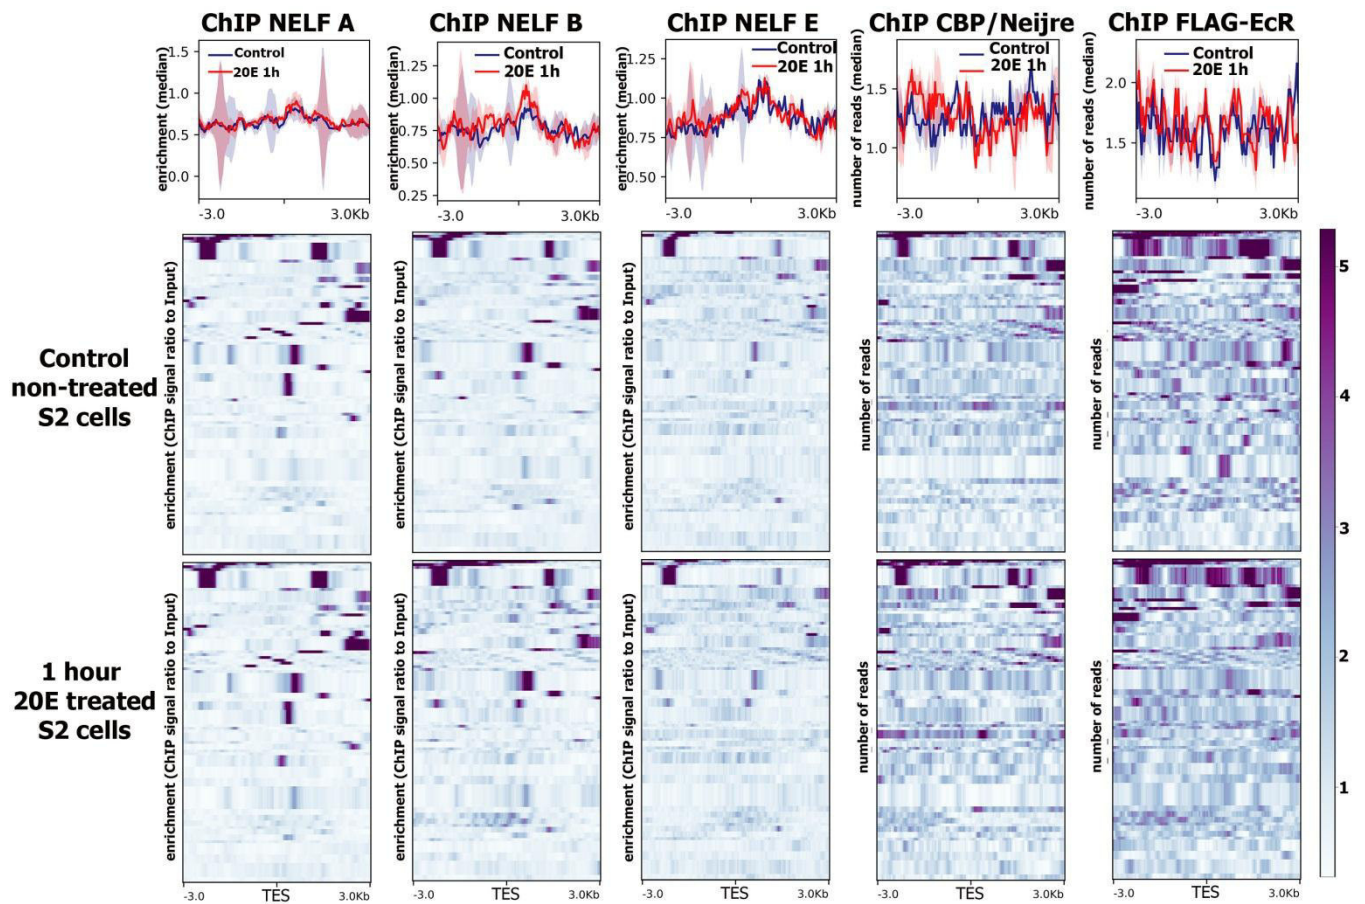

**Supplementary figure 7.** Average distributions of NELF-A, NELF-B, NELF-E, CBP/Neijre, FLAG-EcR binding and RNA-seq signal on transcription end sites (TESs) of 20E-dependent genes in *Drosophila* S2 cells after 1 hour treatment with 20E (20E 1h) or in non-treated cells (control). The ChIP-Seq data on FLAG-EcR binding were obtained in our previous work<sup>1</sup>. NELF-A, NELF-B, NELF-E, CBP/Neijre and FLAG-EcR binding levels were estimated as an enrichment of NELF-A, NELF-B, NELF-E, CBP/Neijre and FLAG-EcR ChIP-Seq signal over input DNA. Pile-up profiles were calculated as a median of NELF-A, NELF-B, NELF-E, CBP/Neijre and FLAG-EcR binding levels. The standard error is displayed on the graphs as lighter area around the main line of the profiles.



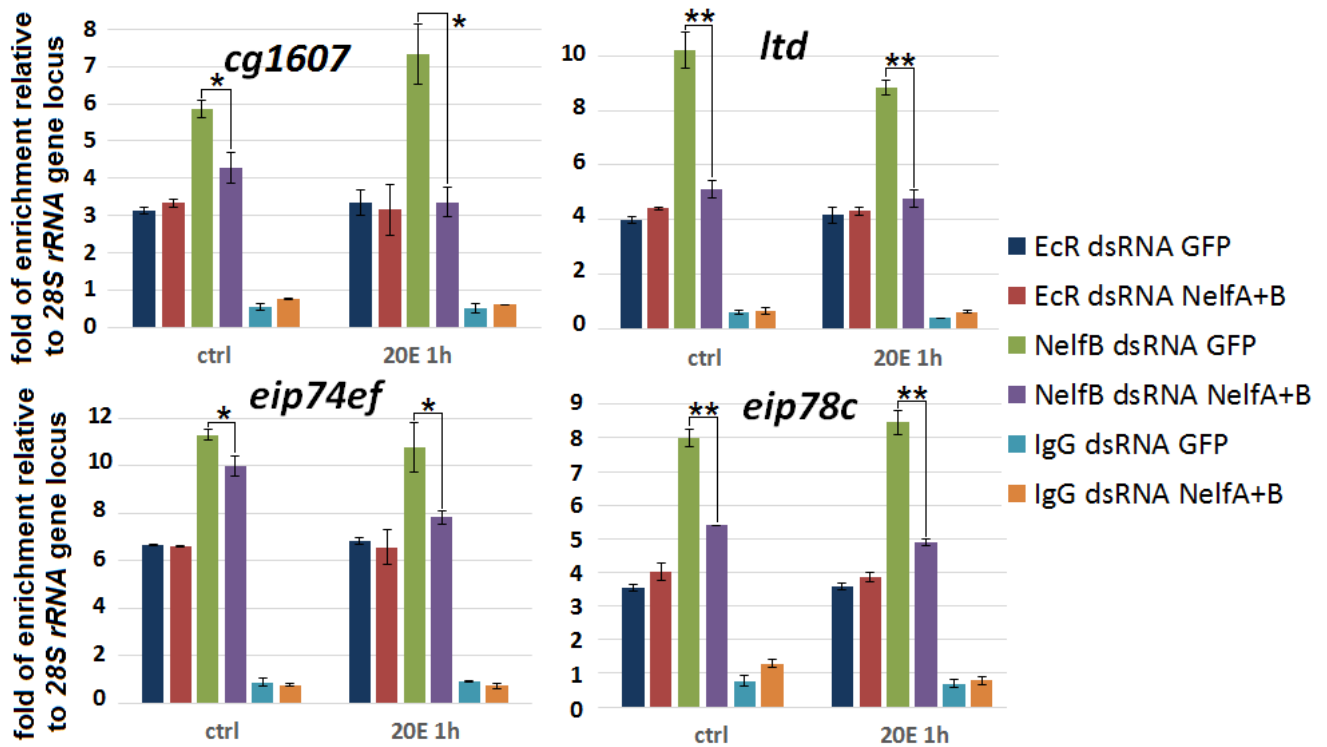

**Supplementary figure 8.** ChIP analysis of EcR and NELF-B binding to 20E-dependent promoters, which demonstrate the strongest reduction in NELF-B binding level upon NELFA+NELF-B knockdown, in 1-hour 20E-induced *Drosophila* S2 cells (20E 1h) relative to DMSO-treated (ctrl). The impact of NELF-A and NELF-B on EcR binding was estimated using RNA interference-mediated knockdown with corresponding dsRNA (GFP dsRNA was taken as a mock RNAi). The Y-axis units represent the fold of enrichment relative to the control region (28S ribosomal RNA gene locus). ChIP with a serum of non-immunized rabbits (IgG) was used to assess the specificity of antibodies. The data are mean values from three independent experiments, error bars represent standard deviations. Asterisks indicate significance levels (Student's t-test), \*\* - p-value < 0.01, \* - p-value < 0.05.

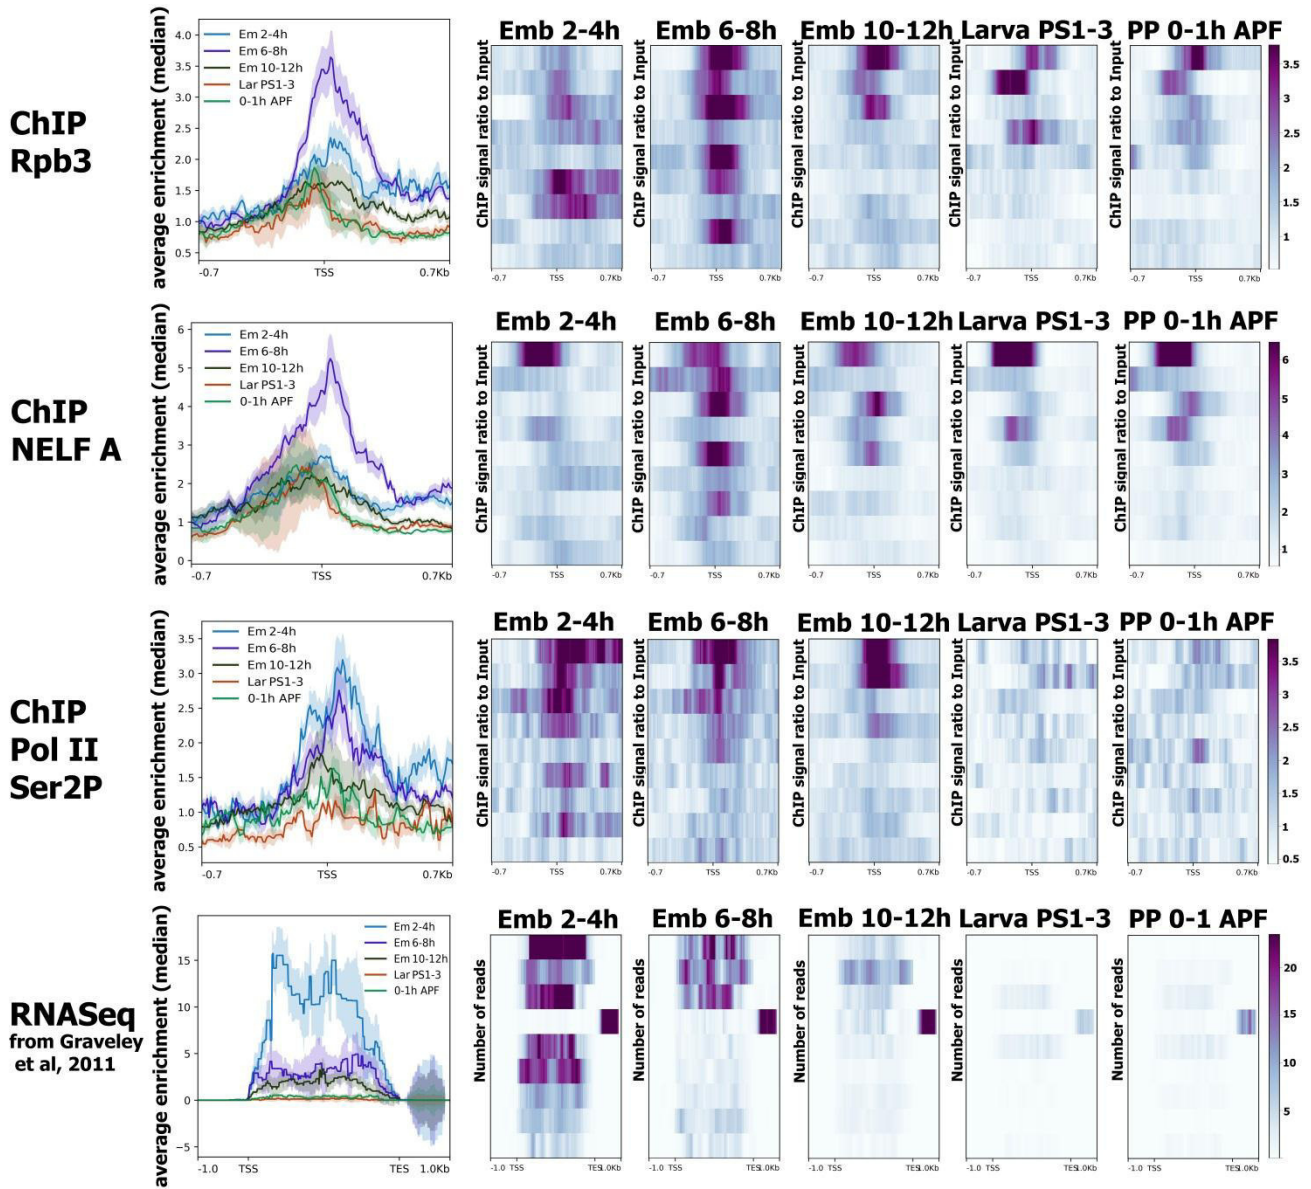

**Supplementary figure 9.** Average distribution of Rbp3, NELF-A and Pol II Ser2P binding on transcription start sites (TSS) of nine GAP genes at different developmental stages (*btd*, *cad*, *kn*, *gt*, *hb*, *hkb*, *kr*, *slp1*, *tll*). Protein binding levels were estimated by ChIP-Seq as an enrichment of ChIP signal to input. Averaged RNA-seq profiles were calculated for GAP genes on different developmental stages, using the data from <sup>2</sup>. Pile-up profiles were calculated as a median of Rbp3, NELF-A and Pol II Ser2P binding levels. The standard error is displayed on the graphs as lighter area around the main line of the profiles.

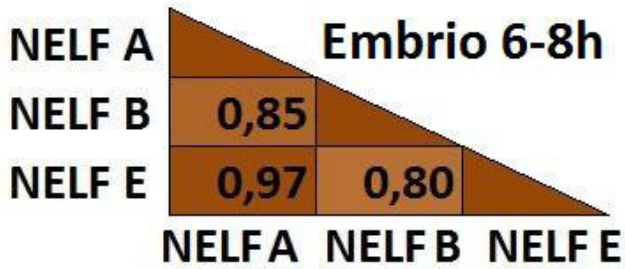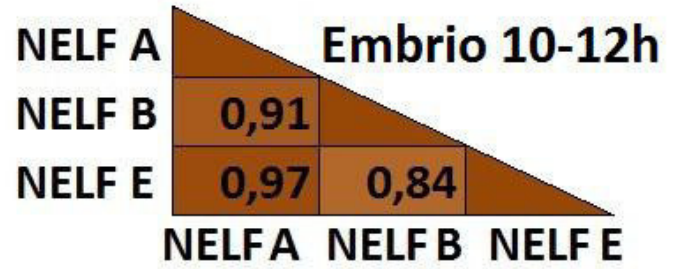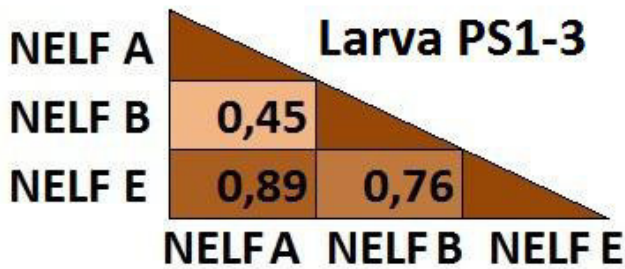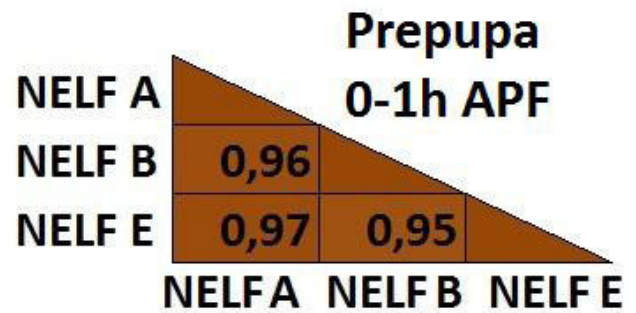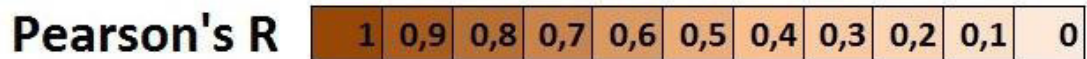

**Supplementary figure 10.** Pearson's correlation matrix for the NELF-A, NELF-B and NELF-E subunits binding to promoters of some stably induced 20E-dependent genes at different developmental stages of *Drosophila*. The list of the genes is the same as on Fig. 4D. The heat map reflects the indicated R values.

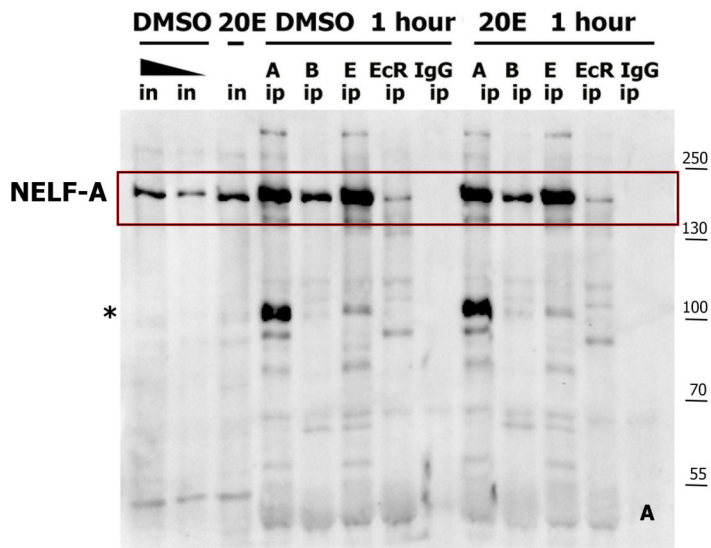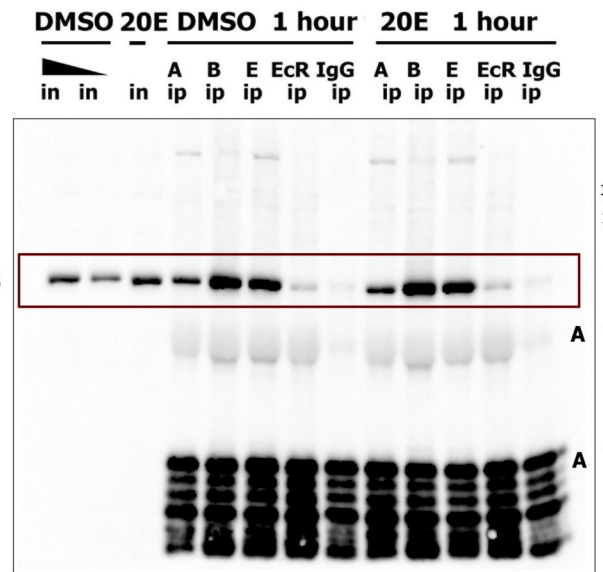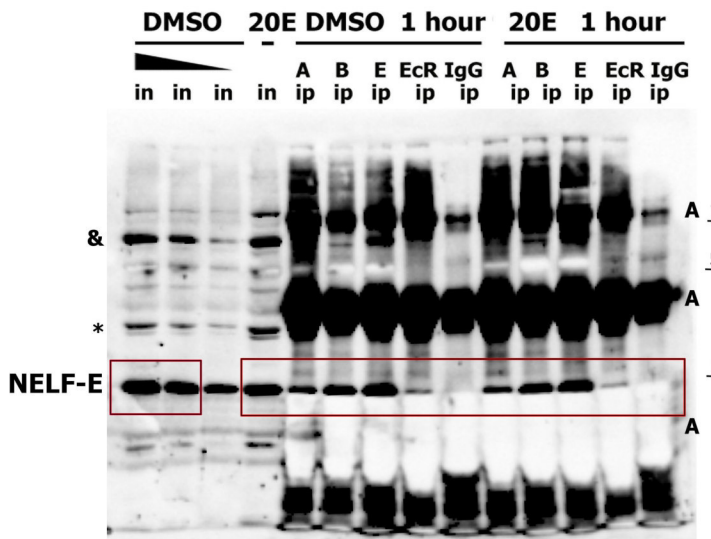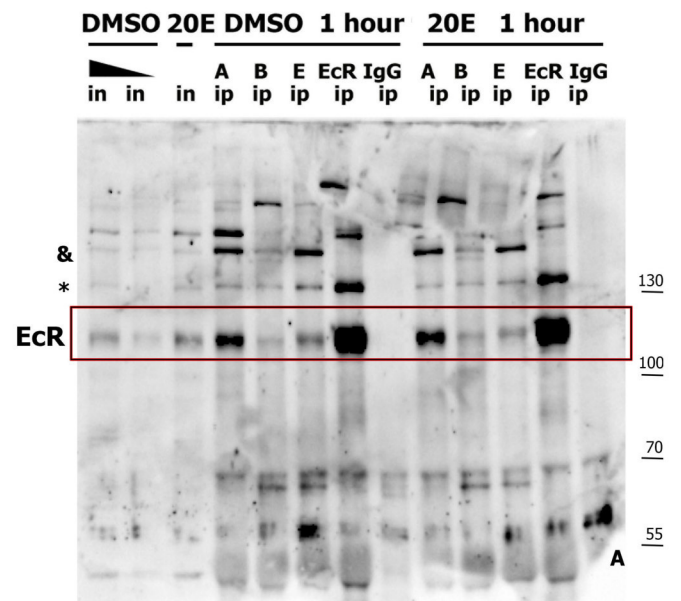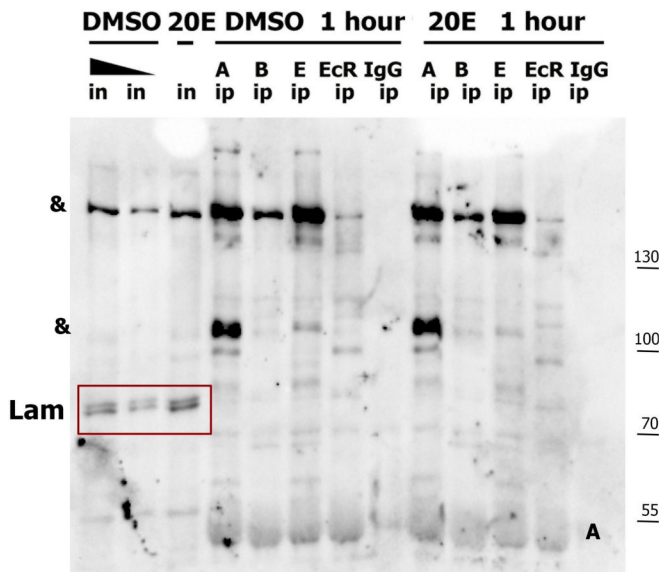

\* Lines corresponding to unspecific antibody-derived background;  
 & Line left from a previous staining of this blot  
 A-Lines derived from antibodies used for the immunoprecipitation

Supplementary figure 11. The original Western blots (full-size) from the Fig. 1A



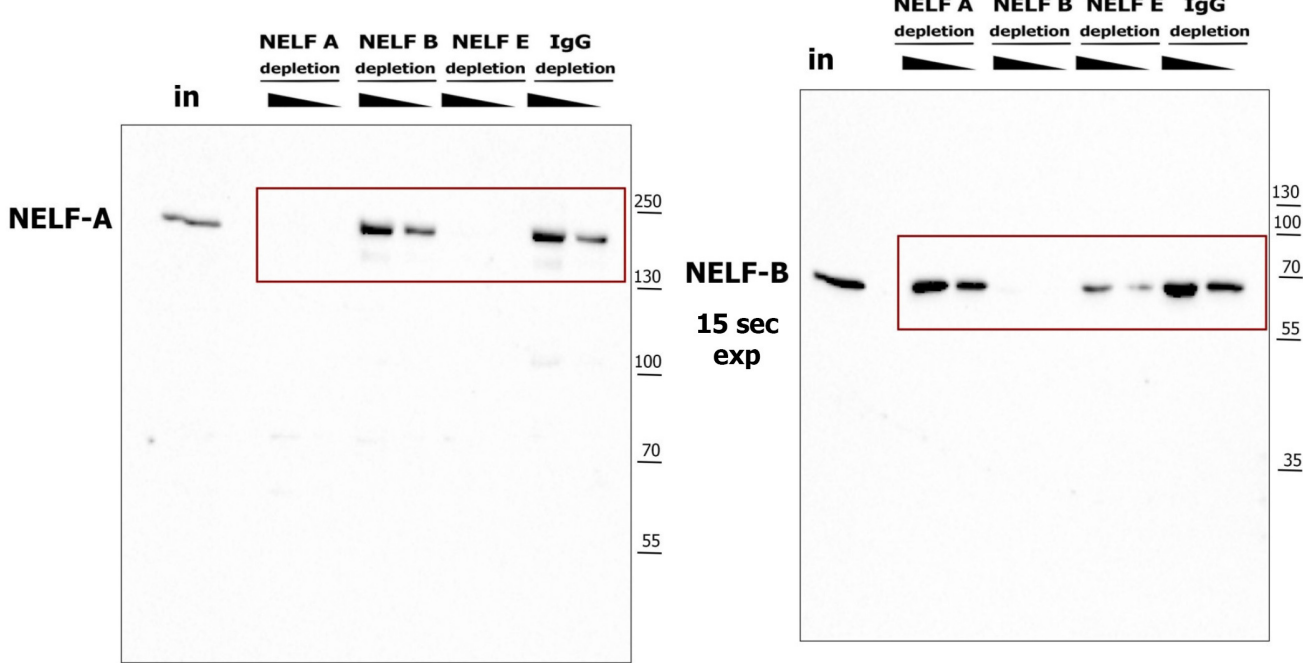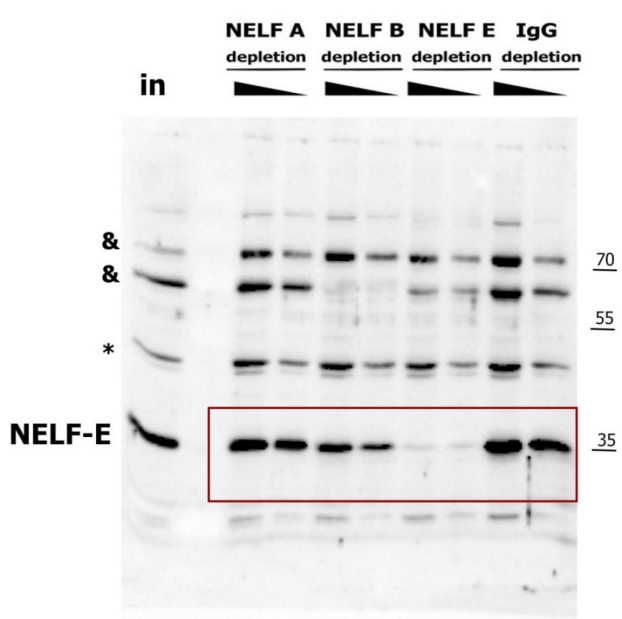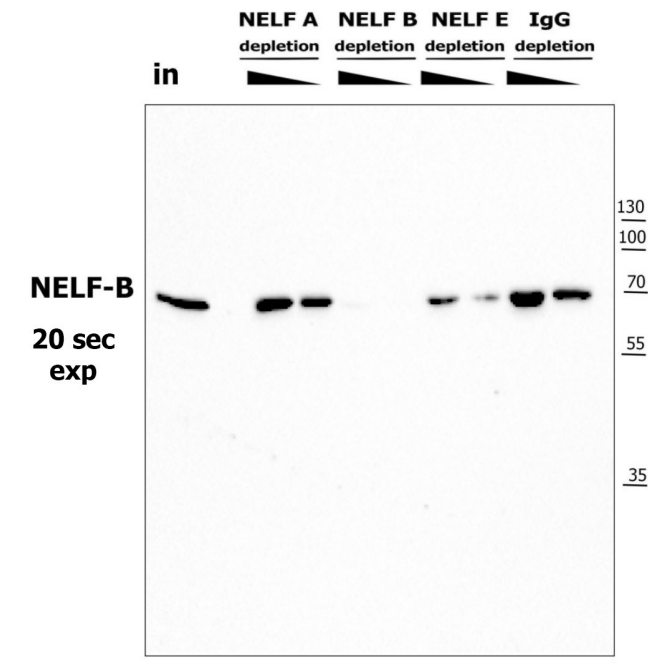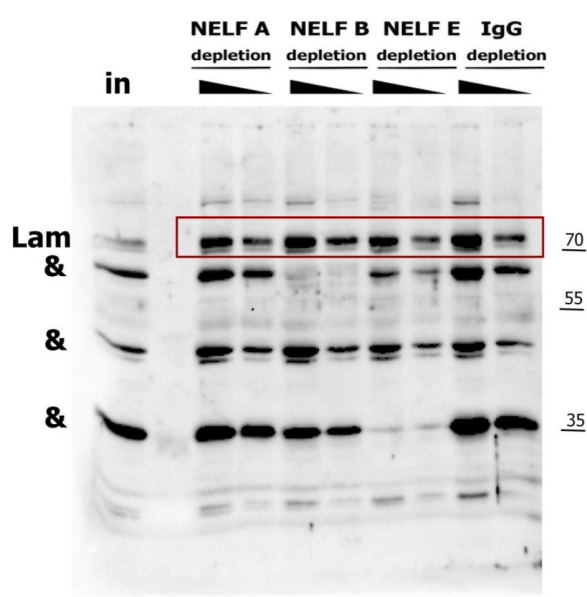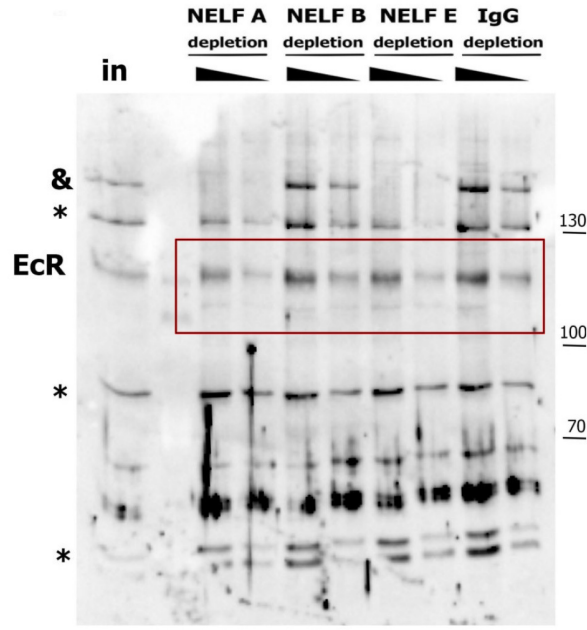

\* Lines corresponding to unspecific antibody-derived background;  
& Line left from a previous staining of this blot

Supplementary figure 12. The original Western blots (full-size) from the Fig. 1B



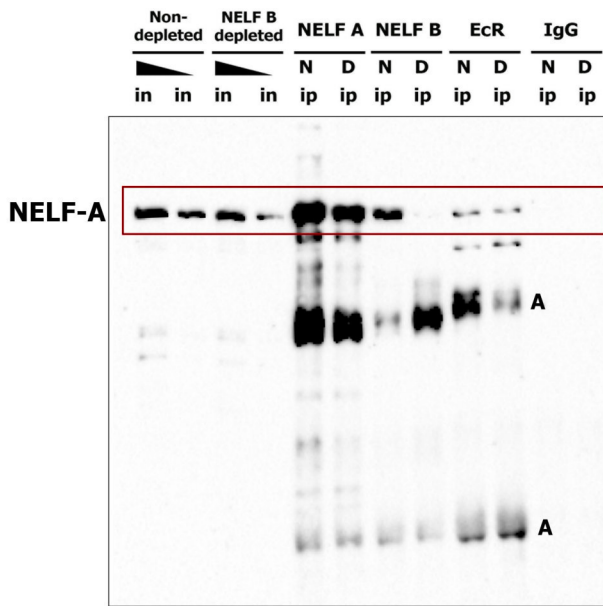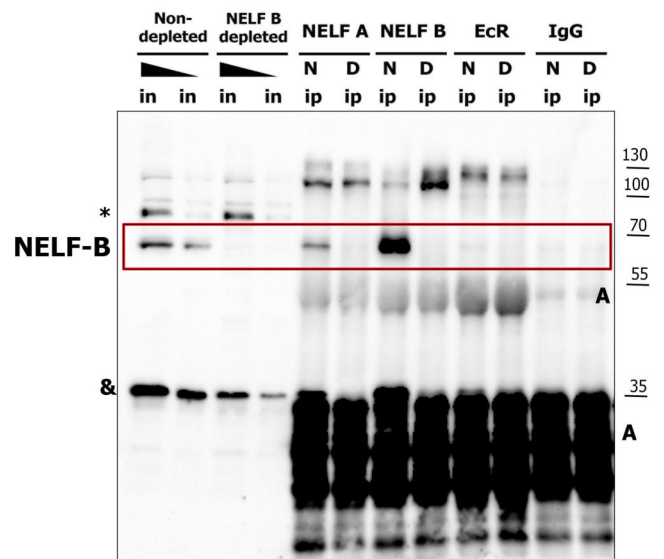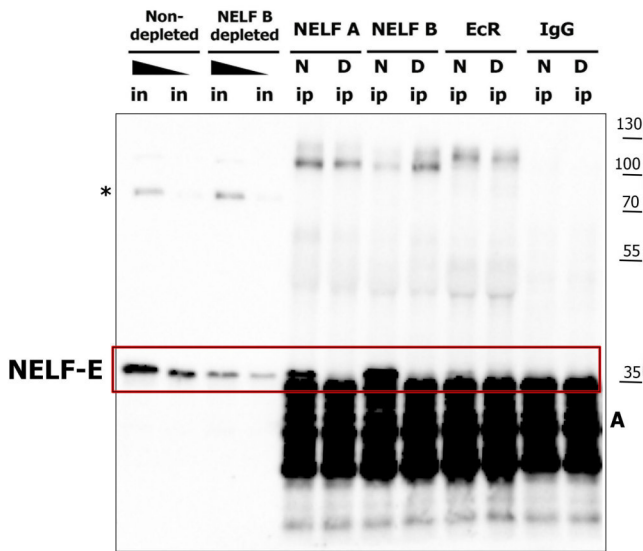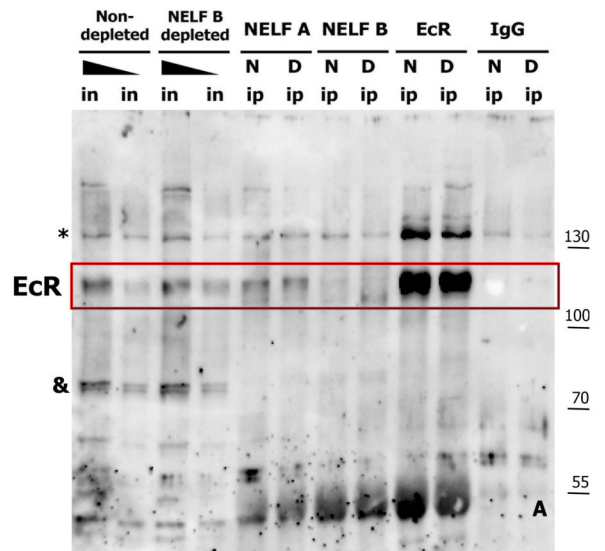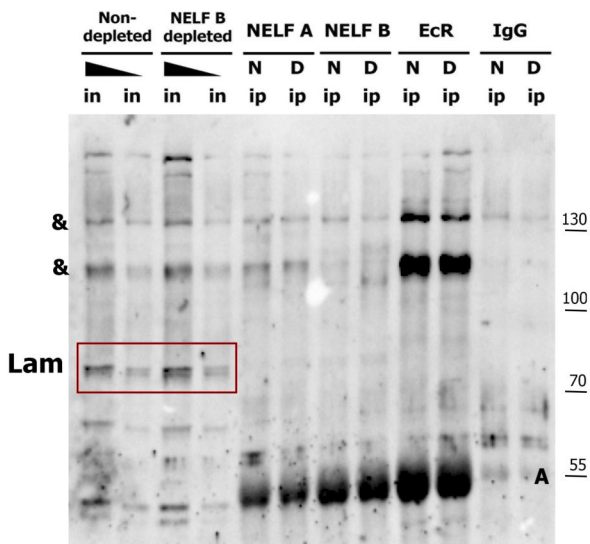

\* Lines corresponding to unspecific antibody-derived background;  
 & Line left from a previous staining of this blot  
 A-Lines derived from antibodies used for the immunoprecipitation

Supplementary figure 13. The original Western blots (full-size) from the Fig. 1C

**Table. S1. List of genes induced by 20E 1hour treatment in S2 cells more than 2 times**

| Chrom | Start    | End      | Name           | Score | Strand | ThickStart | ThickEnd | ItemRGB | BlockCount | BlockSizes                                       | BlockStarts                                                        |
|-------|----------|----------|----------------|-------|--------|------------|----------|---------|------------|--------------------------------------------------|--------------------------------------------------------------------|
| chrX  | 1941939  | 2005462  | NM_001038734.2 | 0     | +      | 1997586    | 2002540  | 0       | 11         | 65,467,186,94,49,58,2824,149,1389,119,3003,      | 0,487,11341,25956,34632,44458,55642,58614,58831,60295,60520,       |
| chrX  | 1941939  | 2005462  | NM_001272227.1 | 0     | +      | 1942864    | 2002540  | 0       | 12         | 65,467,186,94,49,58,980,2824,149,1389,122,3003,  | 0,487,11341,25956,34632,44458,51270,55642,58614,58831,60292,60520, |
| chrX  | 1992299  | 2005462  | NM_001272228.1 | 0     | +      | 1994624    | 2002540  | 0       | 7          | 436,497,2824,149,1389,119,3003,                  | 0,2102,5282,8254,8471,9935,10160,                                  |
| chrX  | 1992299  | 2005462  | NM_001272229.1 | 0     | +      | 1993222    | 2002540  | 0       | 6          | 1890,2824,149,1389,119,3003,                     | 0,5282,8254,8471,9935,10160,                                       |
| chrX  | 1941939  | 2005462  | NM_001272230.1 | 0     | +      | 1989922    | 2002540  | 0       | 12         | 65,467,186,94,49,58,190,2824,149,1389,122,3003,  | 0,487,11341,25956,34632,44458,47818,55642,58614,58831,60292,60520, |
| chrX  | 1941939  | 2005462  | NM_001272231.1 | 0     | +      | 1997586    | 2003572  | 0       | 11         | 65,467,186,94,49,58,2824,149,1389,122,3003,      | 0,487,11341,25956,34632,44458,55642,58614,58831,60292,60520,       |
| chrX  | 1941939  | 2005462  | NM_001272232.1 | 0     | +      | 1997586    | 2004420  | 0       | 12         | 65,467,186,94,49,58,2824,149,1389,122,1093,1842, | 0,487,11341,25956,34632,44458,55642,58614,58831,60292,60520,61681, |
| chrX  | 1941939  | 2005462  | NM_001272233.2 | 0     | +      | 1993222    | 2002540  | 0       | 11         | 954,186,94,49,58,1175,2824,149,1389,122,3003,    | 0,11341,25956,34632,44458,51075,55642,58614,58831,60292,60520,     |
| chrX  | 1941939  | 2007956  | NM_001272234.1 | 0     | +      | 1993222    | 2002540  | 0       | 12         | 65,467,186,94,49,58,1651,2824,149,1389,122,5497, | 0,487,11341,25956,34632,44458,50599,55642,58614,58831,60292,60520, |
| chr2L | 5305649  | 5310610  | NM_001144320.2 | 0     | +      | 5306024    | 5309720  | 0       | 3          | 517,348,2590,                                    | 0,1915,2371,                                                       |
| chr2L | 5288943  | 5310996  | NM_001298694.1 | 0     | +      | 5307779    | 5309720  | 0       | 3          | 566,348,2976,                                    | 0,18621,19077,                                                     |
| chr2L | 5305649  | 5311223  | NM_001298695.1 | 0     | +      | 5306024    | 5309720  | 0       | 3          | 517,348,3203,                                    | 0,1915,2371,                                                       |
| chr2L | 18952205 | 18954431 | NM_001299142.1 | 0     | -      | 18952338   | 18953560 | 0       | 4          | 792,180,387,160,                                 | 0,952,1198,2066,                                                   |
| chr2L | 18952205 | 18954431 | NM_001299143.1 | 0     | -      | 18952338   | 18953560 | 0       | 5          | 792,180,170,117,160,                             | 0,952,1198,1468,2066,                                              |
| chr2L | 21237249 | 21258196 | NM_057584.5    | 0     | +      | 21253669   | 21257829 | 0       | 8          | 97,285,1759,291,150,103,155,451,                 | 0,1031,16305,18288,18647,19696,19853,20496,                        |
| chr2L | 21237249 | 21256186 | NM_057585.3    | 0     | +      | 21253669   | 21256067 | 0       | 5          | 97,285,1759,291,290,                             | 0,1031,16305,18288,18647,                                          |
| chr2L | 5305649  | 5310996  | NM_057843.4    | 0     | +      | 5306024    | 5309720  | 0       | 3          | 517,348,2976,                                    | 0,1915,2371,                                                       |
| chr2L | 3334874  | 3354829  | NM_079909.3    | 0     | -      | 3335656    | 3353392  | 0       | 9          | 978,267,157,639,256,412,210,1239,239,            | 0,1039,1367,1586,2288,2608,3352,17601,19716,                       |
| chr2L | 21237249 | 21259675 | NM_134296.3    | 0     | +      | 21253669   | 21257829 | 0       | 8          | 171,285,1759,291,150,103,155,1930,               | 0,1031,16305,18288,18647,19696,19853,20496,                        |

|       |          |          |                |   |   |          |          |   |    |                                                    |                                                                       |
|-------|----------|----------|----------------|---|---|----------|----------|---|----|----------------------------------------------------|-----------------------------------------------------------------------|
| chr2L | 3334874  | 3354829  | NM_134924.2    | 0 | - | 3335656  | 3353392  | 0 | 9  | 978,267,157,639<br>,256,412,210,<br>1239,991,      | 0,1039,1367,<br>1586<br>,2288,2608,<br>3352,<br>17601,18964,          |
| chr2L | 7194907  | 7204264  | NM_135259.3    | 0 | - | 7195555  | 7196674  | 0 | 5  | 733,350,124,545,<br>326,                           | 0,795,1204,<br>1405,<br>9031,                                         |
| chr2L | 9521209  | 9540060  | NM_135449.4    | 0 | + | 9533581  | 9538654  | 0 | 9  | 231,181,238,1022,<br>855,<br>415,152,130,2256,     | 0,1953,12304,<br>13677,14785,<br>15702,16183,<br>16403,16595,         |
| chr2L | 18952205 | 18954431 | NM_136076.4    | 0 | - | 18952338 | 18953560 | 0 | 4  | 792,180,170,160,                                   | 0,952,1198,<br>2066,                                                  |
| chr2L | 5299646  | 5310625  | NM_164639.2    | 0 | + | 5307779  | 5309720  | 0 | 3  | 105,348,2605,                                      | 0,7918,8374,                                                          |
| chr2L | 7194907  | 7204264  | NM_164741.2    | 0 | - | 7195555  | 7196674  | 0 | 6  | 733,350,124,383<br>,107,330,                       | 0,795,1204,<br>1405,<br>1843,9027,                                    |
| chr2L | 9521209  | 9540060  | NM_164857.3    | 0 | + | 9533581  | 9538654  | 0 | 9  | 286,181,238,1022<br>,855,415<br>,152,130,2256,     | 0,1953,12304,<br>13677,14785,<br>15702,16183,<br>16403,16595,         |
| chr2L | 21237249 | 21259675 | NM_165364.2    | 0 | + | 21253669 | 21257829 | 0 | 8  | 155,285,1759,291,<br>150,103,155,1930,             | 0,1031,16305,<br>18288,18647,<br>19696,19853,<br>20496,               |
| chr2L | 3334874  | 3354829  | NM_205900.2    | 0 | - | 3335656  | 3353392  | 0 | 9  | 978,267,157,639,256<br>,412,210,1239,356,          | 0,1039,1367,<br>1586<br>,2288,2608,<br>3352<br>,17601,19599,          |
| chr2L | 9534747  | 9540060  | NM_205945.2    | 0 | + | 9534899  | 9538654  | 0 | 7  | 46,1022,855,415,<br>152,130,2256,                  | 0,139,1247,<br>2164,<br>2645,2865,<br>3057,                           |
| chr2L | 9521209  | 9540045  | NM_205946.2    | 0 | + | 9533581  | 9538654  | 0 | 8  | 286,238,1022,855<br>,415,152,130,2241,             | 0,12304,13677,<br>14785,15702,<br>16183,16403,<br>16595,              |
| chr2R | 10205453 | 10237348 | NM_001103786.2 | 0 | - | 10208007 | 10237040 | 0 | 9  | 2675,151,244,147<br>,104,164,169,228,351,          | 0,2737,2947,<br>3252,3467,<br>3647,<br>3986,4426,<br>31544,           |
| chr2R | 6087872  | 6131841  | NM_001169590.2 | 0 | - | 6092587  | 6123560  | 0 | 6  | 5861,153,144,515,<br>966,776,                      | 0,5924,6137,<br>6684,35009,<br>43193,                                 |
| chr2R | 8600414  | 8612295  | NM_001169618.2 | 0 | + | 8600581  | 8610888  | 0 | 6  | 815,99,210,345,<br>393,2382,                       | 0,7742,7897,<br>8635,9040,<br>9499,                                   |
| chr2R | 10203994 | 10227957 | NM_001259307.3 | 0 | - | 10208007 | 10222606 | 0 | 10 | 4134,151,244,147,<br>104,170,169,228,<br>1548,629, | 0,4196,4406,<br>4711,4926,<br>5106,<br>5445,5885,<br>18482,23334,     |
| chr2R | 10205453 | 10227957 | NM_001273925.2 | 0 | - | 10207881 | 10222606 | 0 | 10 | 2675,151,244,147,<br>104,170,169,228,<br>1548,635, | 0,2737,2947,<br>3252,3467,<br>3647,3986,<br>4426<br>,17023,<br>21869, |
| chr2R | 9177863  | 9179346  | NM_001299308.1 | 0 | - | 9178433  | 9179219  | 0 | 3  | 681,144,517,                                       | 0,742,966,                                                            |
| chr2R | 9177863  | 9181499  | NM_001299309.1 | 0 | - | 9178433  | 9179219  | 0 | 4  | 681,144,396,63,                                    | 0,742,966,<br>3573,                                                   |
| chr2R | 23978800 | 23985177 | NM_001299872.1 | 0 | + | 23980211 | 23985019 | 0 | 2  | 1945,1634,                                         | 0,4743,                                                               |
| chr2R | 10203994 | 10234607 | NM_001347757.1 | 0 | - | 10208007 | 10233311 | 0 | 9  | 4134,151,244,147,<br>104,164,169,228,<br>2584,     | 0,4196,4406,<br>4711,4926,<br>5106,<br>5445,5885,<br>28029,           |
| chr2R | 23979098 | 23985177 | NM_057546.3    | 0 | + | 23980211 | 23985019 | 0 | 2  | 1647,1634,                                         | 0,4445,                                                               |

|       |          |          |                |   |   |          |          |   |    |                                            |                                                   |
|-------|----------|----------|----------------|---|---|----------|----------|---|----|--------------------------------------------|---------------------------------------------------|
| chr2R | 9177863  | 9181298  | NM_080370.4    | 0 | - | 9178433  | 9181158  | 0 | 4  | 681,144,396,1550,                          | 0,742,966,1885,                                   |
| chr2R | 23979894 | 23985177 | NM_134290.1    | 0 | + | 23980211 | 23985019 | 0 | 2  | 851,1634,                                  | 0,3649,                                           |
| chr2R | 7446188  | 7451553  | NM_136435.4    | 0 | - | 7446400  | 7449768  | 0 | 4  | 701,228,362,108,                           | 0,765,3229,5257,                                  |
| chr2R | 11665767 | 11674782 | NM_136849.2    | 0 | + | 11668578 | 11674431 | 0 | 8  | 50,259,935,151,126,786,286,539,            | 0,2654,3499,5262,6949,7277,8122,8476,             |
| chr2R | 24295398 | 24298111 | NM_138062.3    | 0 | + | 24295649 | 24297991 | 0 | 3  | 451,1477,429,                              | 0,509,2284,                                       |
| chr2R | 6090418  | 6169087  | NM_165461.3    | 0 | - | 6092587  | 6152493  | 0 | 7  | 3315,153,144,515,167,482,332,              | 0,3378,3591,4138,61411,61650,78337,               |
| chr2R | 6091865  | 6157129  | NM_165462.2    | 0 | - | 6092587  | 6152493  | 0 | 8  | 1868,153,144,515,167,482,211,200,          | 0,1931,2144,2691,59964,60203,64292,65064,         |
| chr2R | 6090418  | 6157129  | NM_165463.2    | 0 | - | 6092587  | 6152493  | 0 | 8  | 3315,153,144,515,167,482,257,200,          | 0,3378,3591,4138,61411,61650,65739,66511,         |
| chr2R | 6090418  | 6131922  | NM_165464.3    | 0 | - | 6092587  | 6131117  | 0 | 5  | 3315,153,144,515,857,                      | 0,3378,3591,4138,40647,                           |
| chr2R | 6092276  | 6131922  | NM_165465.3    | 0 | - | 6092587  | 6123560  | 0 | 6  | 1457,153,144,515,966,857,                  | 0,1520,1733,2280,30605,38789,                     |
| chr2R | 8600414  | 8611238  | NM_165611.3    | 0 | + | 8600581  | 8610888  | 0 | 5  | 815,210,345,393,1325,                      | 0,7897,8635,9040,9499,                            |
| chr2R | 9177863  | 9186342  | NM_165658.2    | 0 | - | 9178433  | 9186133  | 0 | 4  | 681,144,396,227,                           | 0,742,966,8252,                                   |
| chr2R | 9177863  | 9186342  | NM_165659.2    | 0 | - | 9178433  | 9185732  | 0 | 4  | 681,144,396,1126,                          | 0,742,966,7353,                                   |
| chr2R | 9177863  | 9186342  | NM_165660.2    | 0 | - | 9178433  | 9185732  | 0 | 5  | 681,144,396,708,227,                       | 0,742,966,7353,8252,                              |
| chr2R | 9177863  | 9180338  | NM_165663.3    | 0 | - | 9178433  | 9180267  | 0 | 4  | 681,144,396,590,                           | 0,742,966,1885,                                   |
| chr2R | 11672055 | 11674782 | NM_165845.2    | 0 | + | 11672214 | 11674431 | 0 | 5  | 243,126,786,286,539,                       | 0,661,989,1834,2188,                              |
| chr2R | 24294096 | 24298111 | NM_166666.2    | 0 | + | 24294220 | 24297991 | 0 | 4  | 125,277,1477,429,                          | 0,1476,1811,3586,                                 |
| chr2R | 10205453 | 10234607 | NM_176121.3    | 0 | - | 10208007 | 10232780 | 0 | 9  | 2675,151,244,147,104,164,169,228,2584,     | 0,2737,2947,3252,3467,3647,3986,4426,26570,       |
| chr2R | 10205453 | 10227957 | NM_176123.5    | 0 | - | 10208007 | 10222606 | 0 | 10 | 2675,151,244,147,104,170,169,228,1548,635, | 0,2737,2947,3252,3467,3647,3986,4426,17023,21869, |
| chr3L | 17558671 | 17576320 | NM_001014590.2 | 0 | - | 17561769 | 17575831 | 0 | 4  | 4087,255,369,1528,                         | 0,5934,6685,16121,                                |
| chr3L | 17560157 | 17619325 | NM_001259887.2 | 0 | - | 17561769 | 17598952 | 0 | 8  | 2601,255,369,508,282,613,709,675,          | 0,4448,5199,37302,38029,38663,42517,58493,        |
| chr3L | 17953357 | 18061453 | NM_001259892.1 | 0 | - | 17953640 | 18059584 | 0 | 8  | 1692,1009,239,145,89,2038,129,508,         | 0,1857,6024,16005,39550,104879,107064,107588,     |
| chr3L | 17950952 | 18064696 | NM_001259893.2 | 0 | - | 17953640 | 18059584 | 0 | 8  | 4097,1009,239,145,89,2038,433,186,         | 0,4262,8429,18410,41955,107284,109469,113558,     |
| chr3L | 21226608 | 21265613 | NM_001259933.1 | 0 | + | 21227472 | 21264423 | 0 | 7  | 198,1134,233,142,641,276,1568,             | 0,649,4271,4560,36387,37103,37437,                |
| chr3L | 21226608 | 21265106 | NM_001259934.1 | 0 | + | 21227472 | 21264423 | 0 | 7  | 54,1134,233,142,641,276,1061,              | 0,649,4271,4560,36387,37103                       |

|       |          |          |                |   |   |          |          |   |    |                                                |                                                |         |
|-------|----------|----------|----------------|---|---|----------|----------|---|----|------------------------------------------------|------------------------------------------------|---------|
|       |          |          |                |   |   |          |          |   |    |                                                |                                                | ,37437, |
| chr3L | 15511888 | 15513202 | NM_001274949.1 | 0 | + | 15512034 | 15513030 | 0 | 4  | 194,194,261,407,                               | 0,283,587,907,                                 |         |
| chr3L | 15511051 | 15513202 | NM_001274950.1 | 0 | + | 15511118 | 15513075 | 0 | 4  | 118,194,261,407,                               | 0,1120,1424,1744,                              |         |
| chr3L | 17396030 | 17404619 | NM_001300164.1 | 0 | - | 17396553 | 17403630 | 0 | 6  | 2300,137,146,232,242,32,                       | 0,2364,2556,5580,7462,8557,                    |         |
| chr3L | 17953357 | 18026032 | NM_001316451.1 | 0 | - | 17953640 | 18025415 | 0 | 6  | 1692,1009,239,145,89,702,                      | 0,1857,6024,16005,39550,71973,                 |         |
| chr3L | 15511051 | 15513202 | NM_079361.3    | 0 | + | 15511118 | 15513030 | 0 | 4  | 118,194,261,407,                               | 0,1120,1424,1744,                              |         |
| chr3L | 17396030 | 17415811 | NM_079401.3    | 0 | - | 17396553 | 17409863 | 0 | 6  | 2300,137,146,232,648,591,                      | 0,2364,2556,5580,13194,19190,                  |         |
| chr3L | 17952161 | 17971439 | NM_079409.3    | 0 | - | 17953640 | 17970909 | 0 | 5  | 2888,1009,239,145,1796,                        | 0,3053,7220,17201,17482,                       |         |
| chr3L | 21226918 | 21266503 | NM_079471.3    | 0 | + | 21227472 | 21264423 | 0 | 6  | 1473,233,142,641,276,2458,                     | 0,3961,4250,36077,36793,37127,                 |         |
| chr3L | 3055907  | 3070839  | NM_139508.3    | 0 | - | 3056724  | 3070539  | 0 | 8  | 845,104,278,153,124,115,59,678,                | 0,911,1085,1522,1733,1921,2158,14254,          |         |
| chr3L | 15511051 | 15513202 | NM_168622.2    | 0 | + | 15511118 | 15513030 | 0 | 4  | 118,182,261,407,                               | 0,1120,1424,1744,                              |         |
| chr3L | 15511051 | 15513202 | NM_168623.2    | 0 | + | 15511118 | 15512369 | 0 | 3  | 118,565,407,                                   | 0,1120,1744,                                   |         |
| chr3L | 17560157 | 17619325 | NM_168739.3    | 0 | - | 17561769 | 17599024 | 0 | 8  | 2601,255,369,508,282,613,709,675,              | 0,4448,5199,37302,38029,38663,42517,58493,     |         |
| chr3L | 17560157 | 17619325 | NM_168740.3    | 0 | - | 17561769 | 17598907 | 0 | 8  | 2601,255,369,508,282,613,709,675,              | 0,4448,5199,37302,38029,38663,42517,58493,     |         |
| chr3L | 17560157 | 17576626 | NM_168741.2    | 0 | - | 17561769 | 17575831 | 0 | 4  | 2601,255,369,1834,                             | 0,4448,5199,14635,                             |         |
| chr3L | 17953357 | 18059598 | NM_168755.1    | 0 | - | 17953640 | 18059584 | 0 | 6  | 1692,1009,239,145,89,1362,                     | 0,1857,6024,16005,39550,104879,                |         |
| chr3L | 17952161 | 17999821 | NM_168756.2    | 0 | - | 17953640 | 17999131 | 0 | 6  | 2888,1009,239,145,89,1399,                     | 0,3053,7220,17201,40746,46261,                 |         |
| chr3L | 17953357 | 17961814 | NM_168757.1    | 0 | - | 17953640 | 17961068 | 0 | 4  | 1692,1009,239,810,                             | 0,1857,6024,7647,                              |         |
| chr3L | 21240346 | 21266503 | NM_168892.3    | 0 | + | 21263111 | 21264423 | 0 | 4  | 457,641,276,2458,                              | 0,22649,23365,23699,                           |         |
| chr3L | 17396030 | 17421514 | NM_170636.2    | 0 | - | 17396553 | 17409863 | 0 | 6  | 2300,137,146,232,648,161,                      | 0,2364,2556,5580,13194,25323,                  |         |
| chr3L | 17396030 | 17406521 | NM_170637.2    | 0 | - | 17396553 | 17406427 | 0 | 5  | 2300,137,146,232,112,                          | 0,2364,2556,5580,10379,                        |         |
| chr3L | 17396030 | 17403734 | NM_170638.2    | 0 | - | 17396553 | 17403630 | 0 | 5  | 2300,137,146,232,242,                          | 0,2364,2556,5580,7462,                         |         |
| chr3L | 15511562 | 15513202 | NM_206371.3    | 0 | + | 15511602 | 15513030 | 0 | 4  | 70,194,261,407,                                | 0,609,913,1233,                                |         |
| chr3L | 3249339  | 3252400  | NR_048218.2    | 0 | + | 3252400  | 3252400  | 0 | 1  | 3061,                                          | 0,                                             |         |
| chr3L | 3249589  | 3254504  | NR_124769.1    | 0 | + | 3254504  | 3254504  | 0 | 1  | 4915,                                          | 0,                                             |         |
| chr3L | 3250593  | 3251002  | NR_133165.1    | 0 | + | 3251002  | 3251002  | 0 | 1  | 409,                                           | 0,                                             |         |
| chr3R | 6389161  | 6405895  | NM_001144543.3 | 0 | - | 6389558  | 6392007  | 0 | 10 | 524,176,114,105,121,506,65,1438,180,518,       | 0,596,849,1040,1227,1426,1999,2143,4570,16216, |         |
| chr3R | 6389161  | 6405895  | NM_001144544.3 | 0 | - | 6389558  | 6391593  | 0 | 12 | 524,176,114,105,121,506,65,684,80,180,283,154, | 0,596,849,1040,1227,1426,                      |         |



|       |          |          |                |   |   |          |          |   |    |                                                        |                                                                                       |
|-------|----------|----------|----------------|---|---|----------|----------|---|----|--------------------------------------------------------|---------------------------------------------------------------------------------------|
|       |          |          |                |   |   |          |          |   |    |                                                        | 1999,<br>2143,3718,<br>4570,<br>16216,<br>16580,                                      |
| chr3R | 6389161  | 6405895  | NM_001170060.2 | 0 | - | 6389558  | 6393873  | 0 | 11 | 524,176,114,105,121,<br>506,65,684,180,106,<br>347,    | 0,596,849,<br>1040,<br>1227,1426,<br>1999,<br>2143,4570,<br>16216,<br>16387,          |
| chr3R | 21051382 | 21060653 | NM_001170197.1 | 0 | - | 21052187 | 21058467 | 0 | 11 | 860,71,92,116,446,<br>159,156,139,165,185,<br>2393,    | 0,3962,4249,<br>4404<br>,4581,5085,<br>5312,<br>6193,6404,<br>6633,<br>6878,          |
| chr3R | 21053203 | 21060653 | NM_001260292.1 | 0 | - | 21053530 | 21058467 | 0 | 12 | 415,71,92,116,446,<br>159,156,139,165,<br>185,208,69,  | 0,2141,2428,<br>2583,<br>2760,3264,<br>3491,<br>4372,4583,<br>4812,<br>5057,7381,     |
| chr3R | 21051382 | 21060800 | NM_001275866.1 | 0 | - | 21052058 | 21058467 | 0 | 12 | 860,71,92,116,446,<br>159,156,139,165,<br>185,208,56,  | 0,3962,4249,<br>4404<br>,4581,5085,<br>5312,<br>6193,6404,<br>6633,<br>6878,9362,     |
| chr3R | 31384398 | 31391893 | NM_001276210.1 | 0 | + | 31387110 | 31390659 | 0 | 9  | 101,323,247,74,146<br>,215,230,253,1305,               | 0,2677,3535,<br>4638,<br>4770,4982,<br>5260,<br>5547,6190,                            |
| chr3R | 31382108 | 31391893 | NM_001276211.1 | 0 | + | 31387110 | 31390659 | 0 | 9  | 227,323,247,74,146<br>,215,230,253,1305,               | 0,4967,5825,<br>6928,<br>7060,7272,<br>7550,<br>7837,8480,                            |
| chr3R | 5257036  | 5269046  | NM_001300242.1 | 0 | + | 5257564  | 5267840  | 0 | 5  | 1085,280,81,140,<br>1585,                              | 0,9716,10084,<br>10226,10425,                                                         |
| chr3R | 21051561 | 21060653 | NM_079701.5    | 0 | - | 21052187 | 21058467 | 0 | 12 | 681,71,92,116,446,<br>159,156,139,165,<br>185,208,372, | 0,3783,<br>4070,<br>4225,4402,<br>4906,<br>5133,6014,<br>6225,<br>6454,6699,<br>8720, |
| chr3R | 4781119  | 4784722  | NM_141238.2    | 0 | - | 4781270  | 4784684  | 0 | 4  | 846,1809,148,290,                                      | 0,1167,3107,<br>3313,                                                                 |
| chr3R | 5264938  | 5268598  | NM_141268.3    | 0 | + | 5265539  | 5267840  | 0 | 5  | 699,280,81,140,1137,                                   | 0,1814,2182,<br>2324,<br>2523,                                                        |
| chr3R | 6389161  | 6405895  | NM_141397.5    | 0 | - | 6389558  | 6392007  | 0 | 11 | 524,176,114,105,<br>121,506,65,1438,<br>80,180,154,    | 0,596,849,<br>1040,<br>1227,1426,<br>1999<br>,2143,3718,<br>4570<br>,16580,           |
| chr3R | 26461526 | 26470008 | NM_143224.4    | 0 | + | 26466681 | 26469402 | 0 | 7  | 120,486,215,544,<br>653,147,725,                       | 0,5058,5605,<br>6017<br>,6619,7330,<br>7757,                                          |
| chr3R | 28878023 | 28880122 | NM_143387.2    | 0 | - | 28878080 | 28880096 | 0 | 1  | 2099,                                                  | 0,                                                                                    |
| chr3R | 31382108 | 31391893 | NM_143608.2    | 0 | + | 31387110 | 31390591 | 0 | 10 | 227,323,247,74,<br>146,215,230,253,<br>62,1305,        | 0,4967,5825,<br>6928,<br>7060,7272,<br>7550,                                          |

|       |          |          |             |   |   |          |          |   |    |                                                |                                                           |
|-------|----------|----------|-------------|---|---|----------|----------|---|----|------------------------------------------------|-----------------------------------------------------------|
|       |          |          |             |   |   |          |          |   |    |                                                | 7837,8189,8480,                                           |
| chr3R | 5257036  | 5268371  | NM_169036.2 | 0 | + | 5257564  | 5267840  | 0 | 5  | 1085,280,81,140,910,                           | 0,9716,10084,10226,10425,                                 |
| chr3R | 5264938  | 5269507  | NM_169037.3 | 0 | + | 5266795  | 5267840  | 0 | 6  | 264,280,81,140,416,426,                        | 0,1814,2182,2324,2523,4143,                               |
| chr3R | 6389161  | 6405895  | NM_169141.4 | 0 | - | 6389558  | 6392007  | 0 | 11 | 524,176,114,105,121,506,65,1438,80,180,518,    | 0,596,849,1040,1227,1426,1999,2143,3718,4570,16216,       |
| chr3R | 21051382 | 21060800 | NM_169944.3 | 0 | - | 21052187 | 21058467 | 0 | 12 | 860,71,92,116,446,159,156,139,165,185,208,56,  | 0,3962,4249,4404,4581,5085,5312,6193,6404,6633,6878,9362, |
| chr3R | 26465539 | 26470008 | NM_170273.2 | 0 | + | 26466681 | 26469402 | 0 | 7  | 112,486,215,544,653,147,725,                   | 0,1045,1592,2004,2606,3317,3744,                          |
| chr3R | 31384398 | 31391893 | NM_170548.2 | 0 | + | 31387110 | 31390591 | 0 | 10 | 101,323,247,74,146,215,230,253,62,1305,        | 0,2677,3535,4638,4770,4982,5260,5547,5899,6190,           |
| chr3R | 21054647 | 21060653 | NM_206529.2 | 0 | - | 21054959 | 21058467 | 0 | 12 | 394,71,92,116,446,159,156,139,165,185,208,372, | 0,697,984,1139,1316,1820,2047,2928,3139,3368,3613,5634,   |

**TableS2. Top9 20E-dependent transcripts where NELF-B promoter-bound level decrease upon NELFA- RNAi more than 2 times**

| Chrom | Start    | End      | Name           | Score | Strand | ThickStart | ThickEnd | ItemRGB | BlockCount | BlockSizes                                 | BlockStarts                                       |
|-------|----------|----------|----------------|-------|--------|------------|----------|---------|------------|--------------------------------------------|---------------------------------------------------|
| chr3R | 31384398 | 31391893 | NM_170548.2    | 0     | +      | 31387110   | 31390591 | 0       | 10         | 101,323,247,74,146,215,230,253,62,1305,    | 0,2677,3535,4638,4770,4982,5260,5547,5899,6190,   |
| chr2R | 9177863  | 9186342  | NM_165658.2    | 0     | -      | 9178433    | 9186133  | 0       | 4          | 681,144,396,227,                           | 0,742,966,8252,                                   |
| chr3L | 21240346 | 21266503 | NM_168892.3    | 0     | +      | 21263111   | 21264423 | 0       | 4          | 457,641,276,2458,                          | 0,22649,23365,23699,                              |
| chr2R | 10203994 | 10227957 | NM_001259307.3 | 0     | -      | 10208007   | 10222606 | 0       | 10         | 4134,151,244,147,104,170,169,228,1548,629, | 0,4196,4406,4711,4926,5106,5445,5885,18482,23334, |
| chr3R | 28878023 | 28880122 | NM_143387.2    | 0     | -      | 28878080   | 28880096 | 0       | 1          | 2099,                                      | 0,                                                |
| chr2R | 24294096 | 24298111 | NM_166666.2    | 0     | +      | 24294220   | 24297991 | 0       | 4          | 125,277,1477,429,                          | 0,1476,1811,3586,                                 |
| chrX  | 1622731  | 1645162  | NM_001201597.1 | 0     | +      | 1624521    | 1643765  | 0       | 8          | 257,570,189,454,274,140,51,2278,           | 0,1406,13100,13364,13907,14268,14552,20153,       |
| chr2L | 3334874  | 3354829  | NM_079909.3    | 0     | -      | 3335656    | 3353392  | 0       | 9          | 978,267,157,639,256,412,210,1239,239,      | 0,1039,1367,1586,2288,2608,3352,17601,19716,      |
| chr2L | 7194907  | 7204264  | NM_164741.2    | 0     | -      | 7195555    | 7196674  | 0       | 6          | 733,350,124,383,107,330,                   | 0,795,1204,1405,1843,9027,                        |

**TableS3. 27 20E-dependent transcripts where NELF-B promoter-bound level remains unchanged upon NELFA-B RNAi**

| Chrom | Start    | End      | Name           | Score | Strand | ThickStart | ThickEnd | ItemRGB | BlockCount | BlockSizes                                     | BlockStarts                                                    |
|-------|----------|----------|----------------|-------|--------|------------|----------|---------|------------|------------------------------------------------|----------------------------------------------------------------|
| chr2R | 8600414  | 8611238  | NM_165611.3    | 0     | +      | 8600581    | 8610888  | 0       | 5          | 815,210,345,393,1325,                          | 0,7897,8635,9040,9499,                                         |
| chr3R | 6389161  | 6405895  | NM_001144544.3 | 0     | -      | 6389558    | 6391593  | 0       | 12         | 524,176,114,105,121,506,65,684,80,180,283,154, | 0,596,849,1040,1227,1426,1999,2143,3718,4570,16216,16580,      |
| chr3R | 5264938  | 5268598  | NM_141268.3    | 0     | +      | 5265539    | 5267840  | 0       | 5          | 699,280,81,140,1137,                           | 0,1814,2182,2324,2523,                                         |
| chr2L | 9521209  | 9540060  | NM_164857.3    | 0     | +      | 9533581    | 9538654  | 0       | 9          | 286,181,238,1022,855,415,152,130,2256,         | 0,1953,12304,13677,14785,15702,16183,16403,16595,              |
| chr2L | 21237249 | 21259675 | NM_165364.2    | 0     | +      | 21253669   | 21257829 | 0       | 8          | 155,285,1759,291,150,103,155,1930,             | 0,1031,16305,18288,18647,19696,19853,20496,                    |
| chr2L | 5305649  | 5310996  | NM_057843.4    | 0     | +      | 5306024    | 5309720  | 0       | 3          | 517,348,2976,                                  | 0,1915,2371,                                                   |
| chr3L | 17560157 | 17576626 | NM_168741.2    | 0     | -      | 17561769   | 17575831 | 0       | 4          | 2601,255,369,1834,                             | 0,4448,5199,14635,                                             |
| chr3L | 17396030 | 17421514 | NM_170636.2    | 0     | -      | 17396553   | 17409863 | 0       | 6          | 2300,137,146,232,648,161,                      | 0,2364,2556,5580,13194,25323,                                  |
| chr3L | 15511051 | 15513202 | NM_168623.2    | 0     | +      | 15511118   | 15512369 | 0       | 3          | 118,565,407,                                   | 0,1120,1744,                                                   |
| chr3R | 26461526 | 26470008 | NM_143224.4    | 0     | +      | 26466681   | 26469402 | 0       | 7          | 120,486,215,544,653,147,725,                   | 0,5058,5605,6017,6619,7330,7757,                               |
| chr2L | 18952205 | 18954431 | NM_001299142.1 | 0     | -      | 18952338   | 18953560 | 0       | 4          | 792,180,387,160,                               | 0,952,1198,2066,                                               |
| chr3L | 5654680  | 5657384  | NM_139726.2    | 0     | +      | 5654979    | 5657119  | 0       | 5          | 366,137,149,151,349,                           | 0,1638,1924,2142,2355,                                         |
| chrX  | 1941939  | 2005462  | NM_001272233.2 | 0     | +      | 1993222    | 2002540  | 0       | 11         | 954,186,94,49,58,1175,2824,149,1389,122,3003,  | 0,11341,25956,34632,44458,51075,55642,58614,58831,60292,60520, |
| chr3L | 17952161 | 17999821 | NM_168756.2    | 0     | -      | 17953640   | 17999131 | 0       | 6          | 2888,1009,239,145,89,1399,                     | 0,3053,7220,17201,40746,46261,                                 |
| chr2R | 11665767 | 11674782 | NM_136849.2    | 0     | +      | 11668578   | 11674431 | 0       | 8          | 50,259,935,151,126,786,286,539,                | 0,2654,3499,5262,6949,7277,8122,8476,                          |
| chr3L | 17953357 | 17961814 | NM_168757.1    | 0     | -      | 17953640   | 17961068 | 0       | 4          | 1692,1009,239,810,                             | 0,1857,6024,7647,                                              |
| chr2R | 8611378  | 8614155  | NM_136552.3    | 0     | -      | 8611893    | 8614155  | 0       | 2          | 681,1122,                                      | 0,1655,                                                        |
| chr3L | 3055907  | 3070839  | NM_139508.3    | 0     | -      | 3056724    | 3070539  | 0       | 8          | 845,104,278,153,124,115,59,678,                | 0,911,1085,1522,1733,1921,2158,14254,                          |
| chr2R | 7446188  | 7451553  | NM_136435.4    | 0     | -      | 7446400    | 7449768  | 0       | 4          | 701,228,362,108,                               | 0,765,3229,5257,                                               |
| chr2R | 23979098 | 23985177 | NM_057546.3    | 0     | +      | 23980211   | 23985019 | 0       | 2          | 1647,1634,                                     | 0,4445,                                                        |
| chr2L | 14844992 | 14851749 | NM_001014484.2 | 0     | -      | 14845116   | 14849122 | 0       | 7          | 369,277,742,250,304,103,468,                   | 0,424,760,3012,3681,4046,6289,                                 |
| chr3R | 21051561 | 21060653 | NM_079701.5    | 0     | -      | 21052187   | 21058467 | 0       | 12         | 681,71,92,116,446,159,156,139,165,185,208,372, | 0,3783,4070,4225,4402,4906,5133,6014,6225,6454,6699,8720,      |
| chr3L | 13860026 | 13866905 | NM_140408.3    | 0     | -      | 13860756   | 13866691 | 0       | 4          | 1772,235,119,303,                              | 0,1892,5290,6576,                                              |
| chr2R | 6092276  | 6131922  | NM_165465.3    | 0     | -      | 6092587    | 6123560  | 0       | 6          | 1457,153,144,515,966,857,                      | 0,1520,1733,2280,30605,38789,                                  |
| chr3R | 30243977 | 30246703 | NM_143527.3    | 0     | -      | 30244105   | 30246621 | 0       | 3          | 723,601,143,                                   | 0,1546,2583,                                                   |

|       |         |         |             |   |   |         |         |   |   |                   |                       |
|-------|---------|---------|-------------|---|---|---------|---------|---|---|-------------------|-----------------------|
| chr3R | 4781119 | 4784722 | NM_141238.2 | 0 | - | 4781270 | 4784684 | 0 | 4 | 846,1809,148,290, | 0,1167,3107,<br>3313, |
|-------|---------|---------|-------------|---|---|---------|---------|---|---|-------------------|-----------------------|

**Table. S4. List of 20E-dependent transcripts induced both in embryo and prepupa**

| Chrom | Start    | End      | Name           | Score | Strand | ThickStart | ThickEnd | ItemRGB | BlockCount | BlockSizes                                            | BlockStarts                                                                    |
|-------|----------|----------|----------------|-------|--------|------------|----------|---------|------------|-------------------------------------------------------|--------------------------------------------------------------------------------|
| chr2R | 10203994 | 10227957 | NM_001259307.3 | 0     | -      | 10208007   | 10222606 | 0       | 10         | 4134,151,244,147,<br>104,170,169,228,<br>1548,629,    | 0,4196,4406,<br>4711,4926<br>,5106,5445,<br>5885,18482,<br>23334,              |
| chrX  | 1941939  | 2005462  | NM_001272233.2 | 0     | +      | 1993222    | 2002540  | 0       | 11         | 954,186,94,49,58,<br>1175,2824,149,<br>1389,122,3003, | 0,11341,25956<br>,34632,44458<br>,51075,55642,<br>58614,58831,<br>60292,60520, |
| chr2L | 3334874  | 3354829  | NM_079909.3    | 0     | -      | 3335656    | 3353392  | 0       | 9          | 978,267,157,639,<br>256,412,210,<br>1239,239,         | 0,1039,1367,<br>1586,2288,<br>2608,3352,<br>17601,19716,                       |
| chr2L | 5305649  | 5310996  | NM_057843.4    | 0     | +      | 5306024    | 5309720  | 0       | 3          | 517,348,2976,                                         | 0,1915,2371,                                                                   |
| chr2L | 21237249 | 21259675 | NM_165364.2    | 0     | +      | 21253669   | 21257829 | 0       | 8          | 155,285,1759,291,<br>150,103,155,1930,                | 0,1031,16305,<br>18288,18647,<br>19696,19853<br>,20496,                        |
| chr3L | 17952161 | 17999821 | NM_168756.2    | 0     | -      | 17953640   | 17999131 | 0       | 6          | 2888,1009,239,<br>145,89,1399,                        | 0,3053,7220,<br>17201,40746<br>,46261,                                         |
| chr3L | 17953357 | 17961814 | NM_168757.1    | 0     | -      | 17953640   | 17961068 | 0       | 4          | 1692,1009,239,810,                                    | 0,1857,6024,<br>7647,                                                          |
| chr2R | 6092276  | 6131922  | NM_165465.3    | 0     | -      | 6092587    | 6123560  | 0       | 6          | 1457,153,144,<br>515,966,857,                         | 0,1520,1733,<br>2280,30605,<br>38789,                                          |
| chr2R | 8600414  | 8611238  | NM_165611.3    | 0     | +      | 8600581    | 8610888  | 0       | 5          | 815,210,345,<br>393,1325,                             | 0,7897,8635<br>,9040,9499,                                                     |
| chr3L | 3055907  | 3070839  | NM_139508.3    | 0     | -      | 3056724    | 3070539  | 0       | 8          | 845,104,278,<br>153,124,115<br>,59,678,               | 0,911,1085,<br>1522,1733,<br>1921,2158,<br>14254,                              |
| chr3R | 28878023 | 28880122 | NM_143387.2    | 0     | -      | 28878080   | 28880096 | 0       | 1          | 2099,                                                 | 0,                                                                             |
| chr2R | 23979098 | 23985177 | NM_057546.3    | 0     | +      | 23980211   | 23985019 | 0       | 2          | 1647,1634,                                            | 0,4445,                                                                        |
